# Supplementary material
Source: PubMed Central journal article supplement (PMC3306449)
Supplement: NIHMS361774-supplement-1_si_001.pdf [file NIHMS361774-supplement-1_si_001.pdf]

**Suzuki Coupling Using Benzyl Chlorides**  
**With Potassium Cyclopropyl- and Alkoxytrifluoroborates**

**Virginie Colombel,<sup>‡</sup> Frederik Rombouts,<sup>\*‡</sup> Daniel Oehlrich<sup>‡</sup> and Gary A. Molander<sup>\*†</sup>**

<sup>‡</sup> Neuroscience Medicinal Chemistry, Research & Development, Janssen Pharmaceutica, Turnhoutseweg 30, 2340 Beerse, Belgium.

<sup>†</sup> Roy and Diana Vagelos Laboratories, Department of Chemistry, University of Pennsylvania, Philadelphia, Pennsylvania 19104-6323, United States.

**Contents**

|                                                                        |     |
|------------------------------------------------------------------------|-----|
| <sup>1</sup> H and <sup>13</sup> C NMR spectra of compounds 1b-l.....  | S2  |
| <sup>1</sup> H and <sup>13</sup> C NMR spectra of compounds 2a-g ..... | S22 |

**$^1\text{H}$  and  $^{13}\text{C}$  NMR spectra of compounds 1b-l**

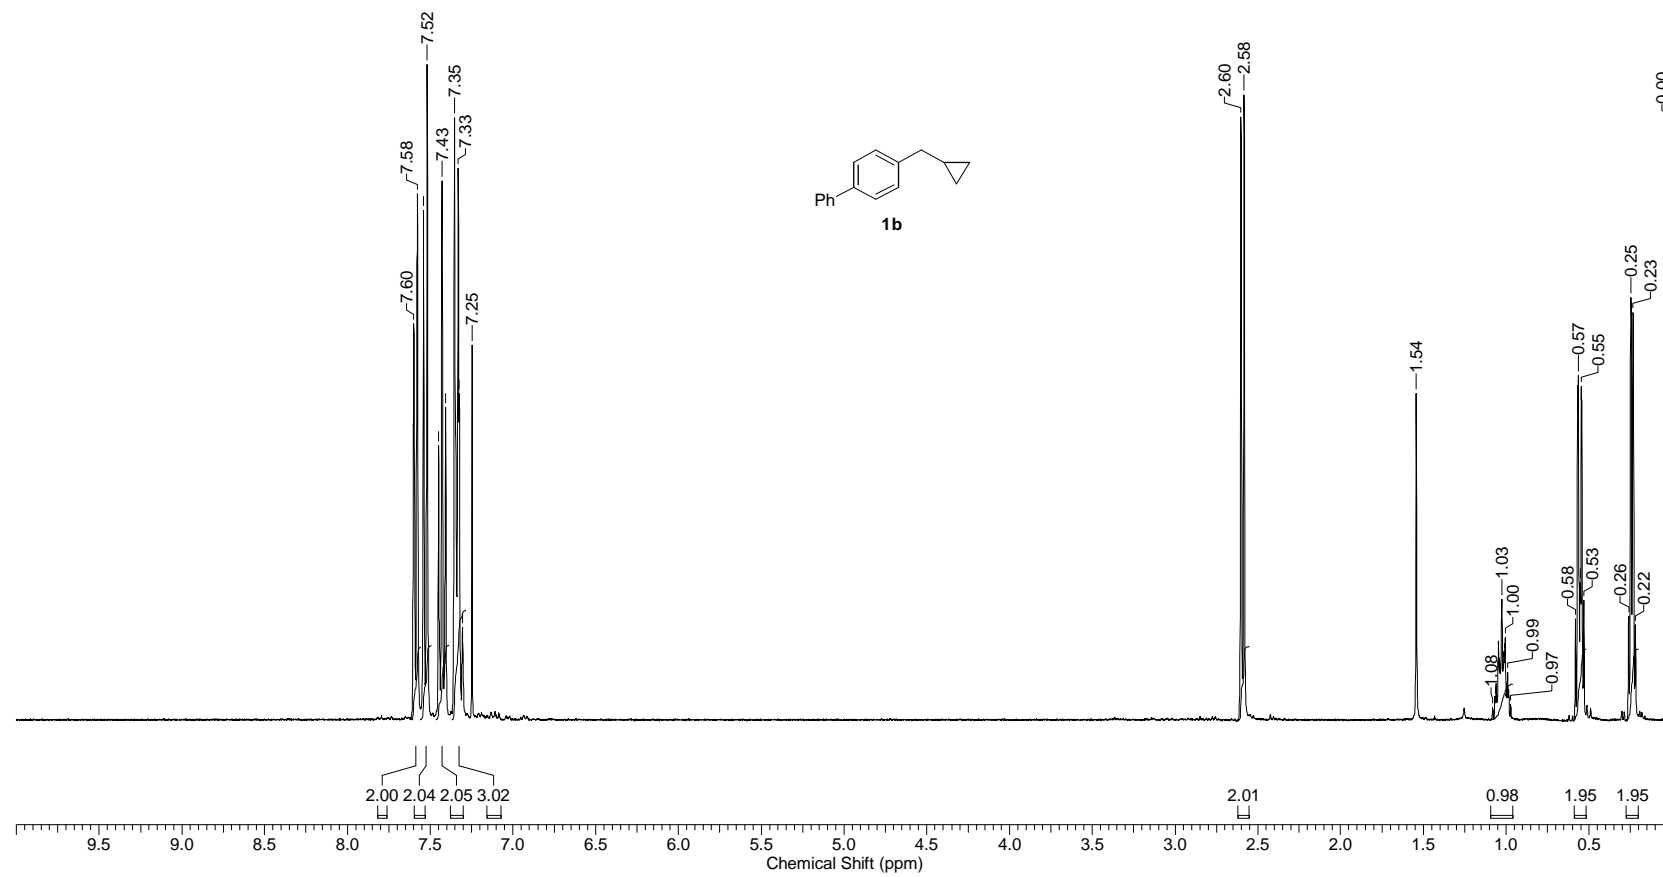

$^1\text{H}$  NMR (360 MHz,  $\text{CDCl}_3$ ) Spectrum of 4-cyclopropylmethyl-biphenyl **1b**  
(Table 2, entry 1)

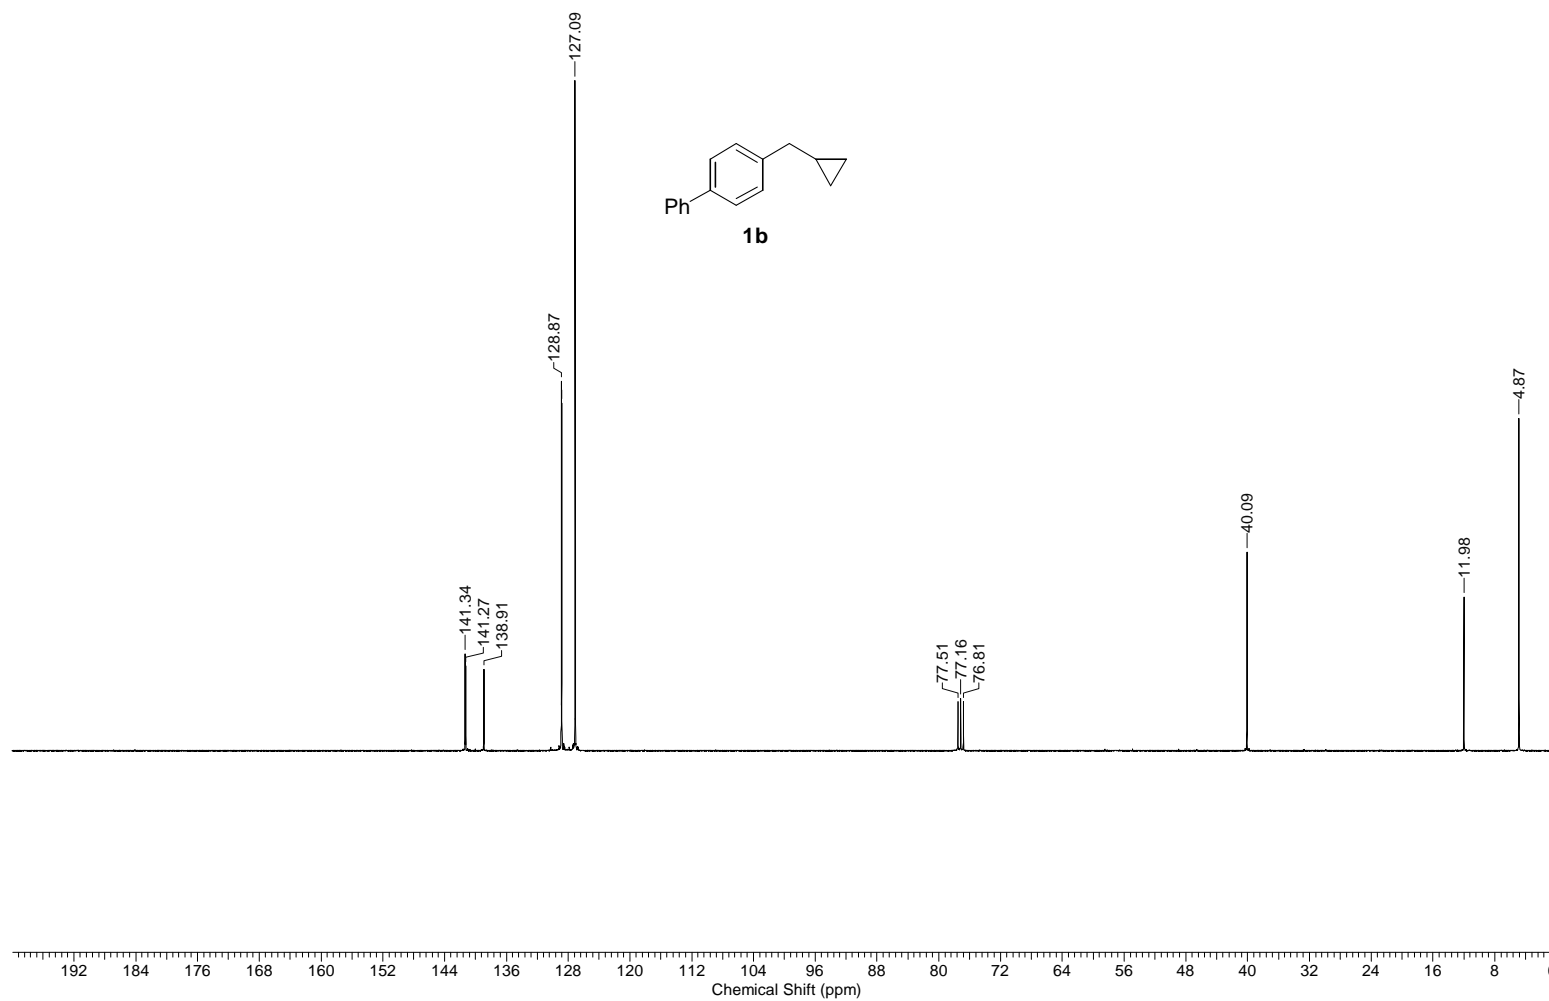

$^{13}\text{C}$  NMR (90 MHz,  $\text{CDCl}_3$ ) Spectrum of 4-cyclopropylmethyl-biphenyl **1b**  
(Table 2, entry 1)

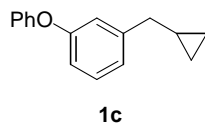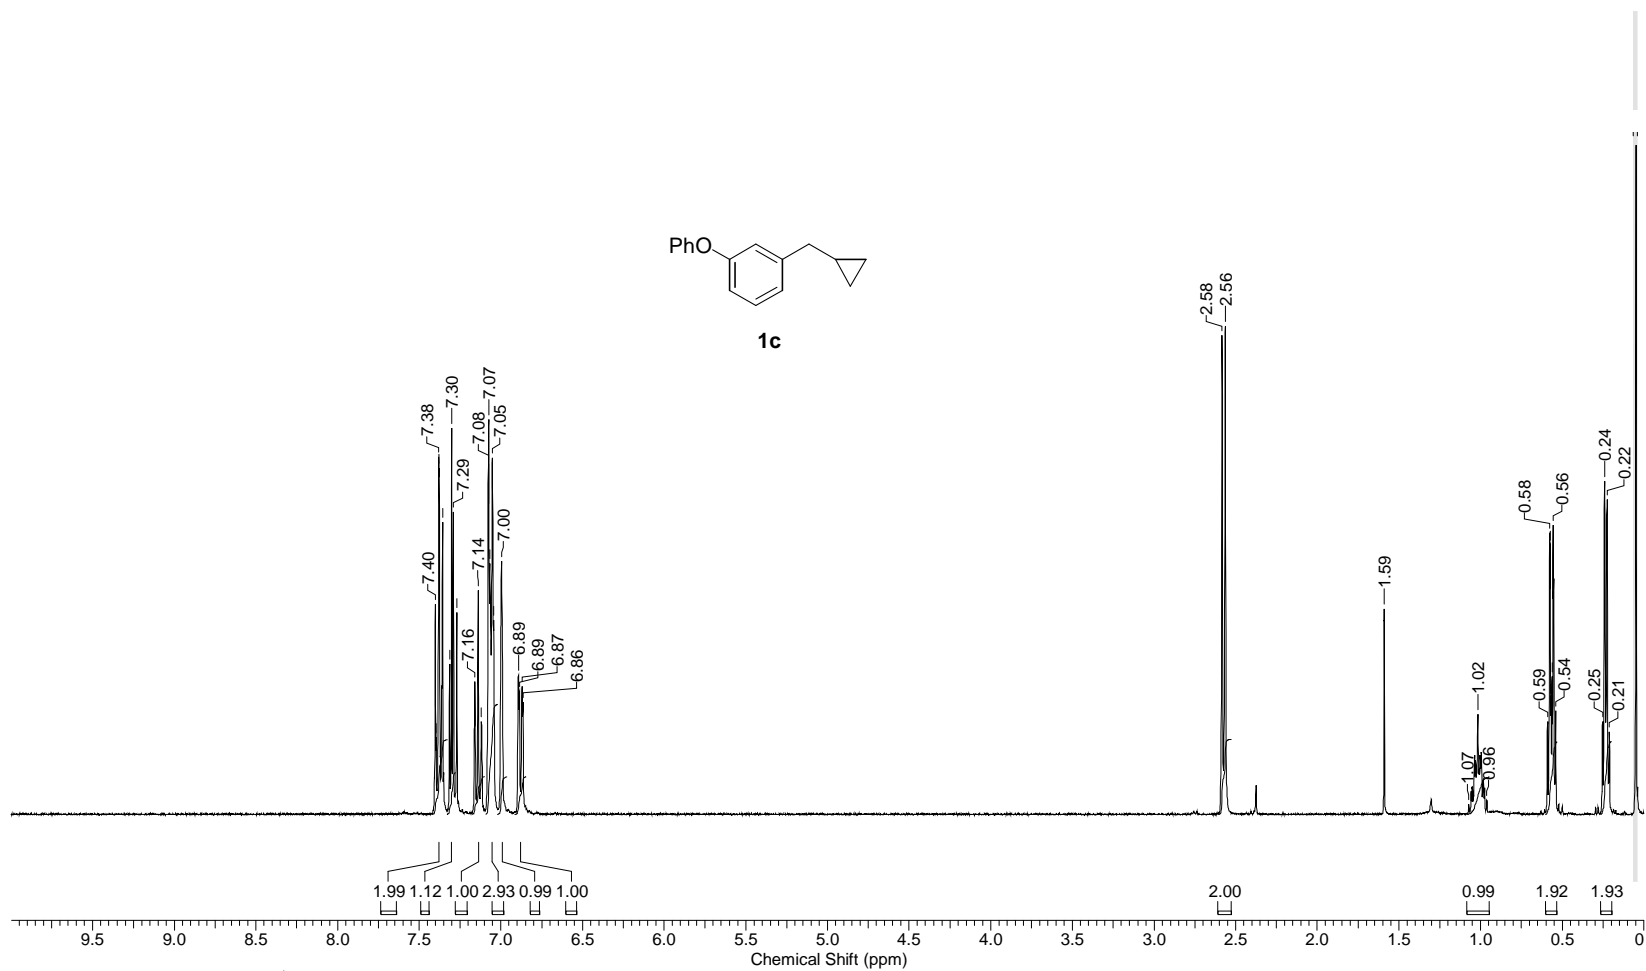

$^1\text{H}$  NMR (360 MHz,  $\text{CDCl}_3$ ) Spectrum of 1-cyclopropylmethyl-3-phenoxybenzene **1c**  
(Table 2, entry 2)

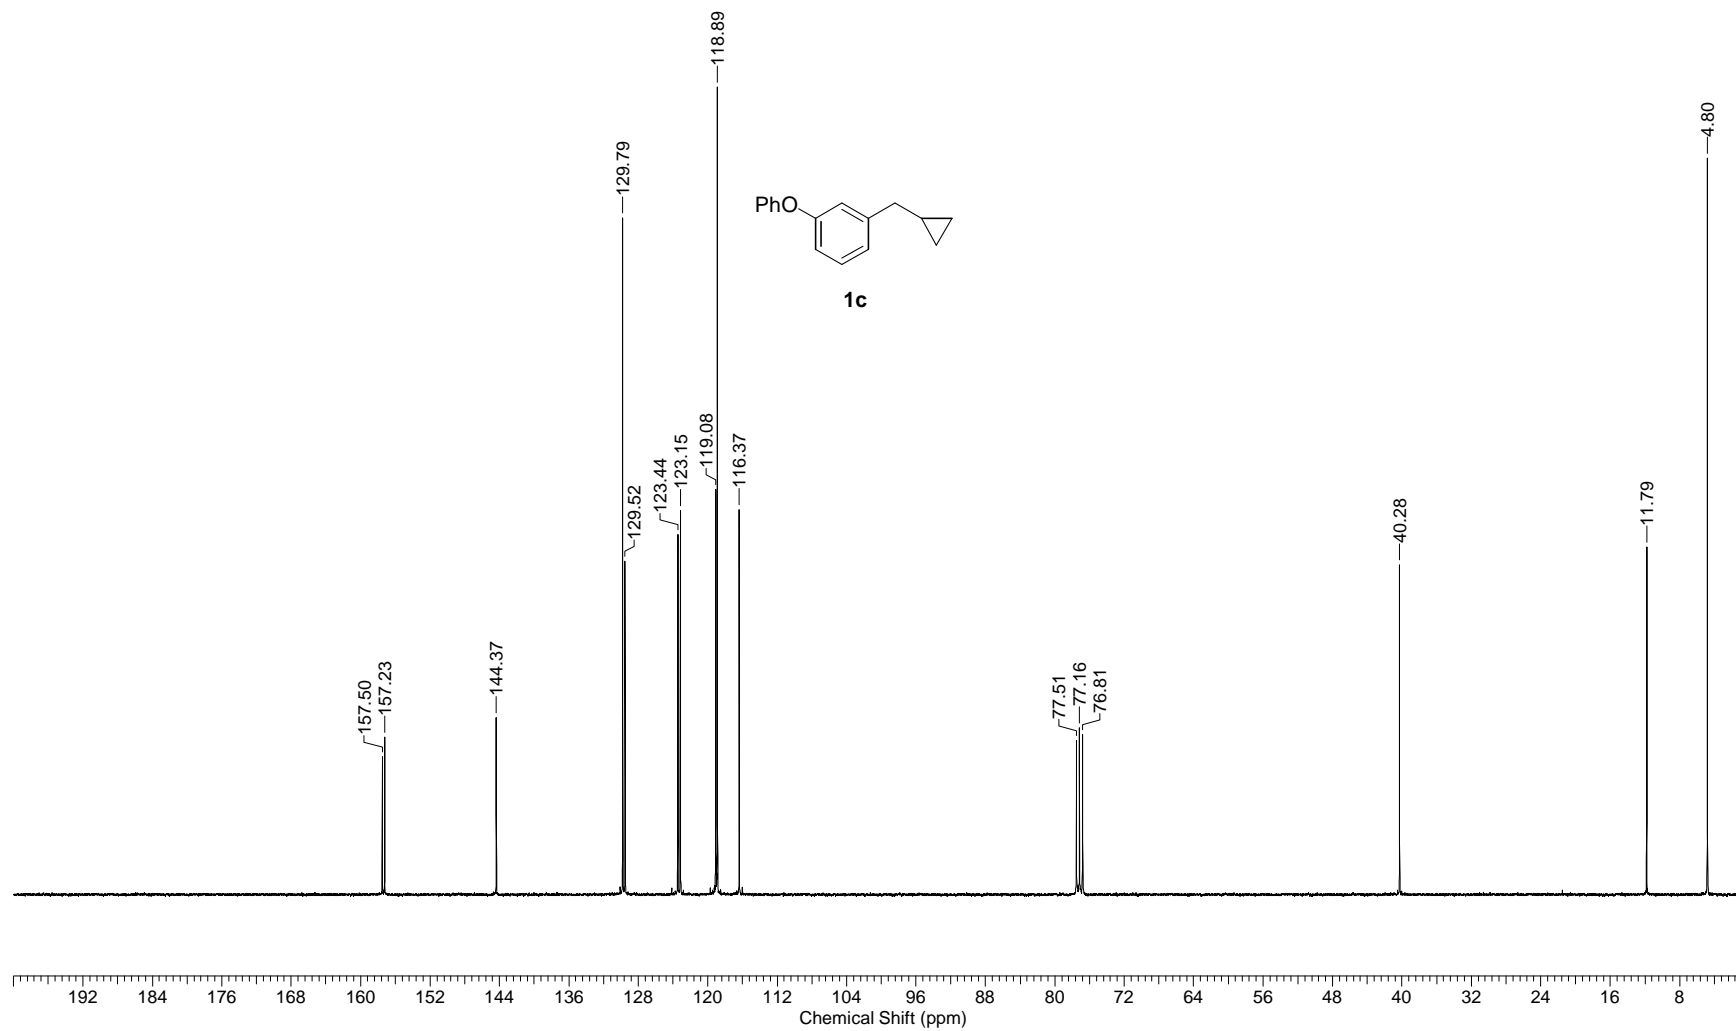

<sup>13</sup>C NMR (90 MHz, CDCl<sub>3</sub>) Spectrum of 1-cyclopropylmethyl-3-phenoxybenzene **1c**  
(Table 2, entry 2)

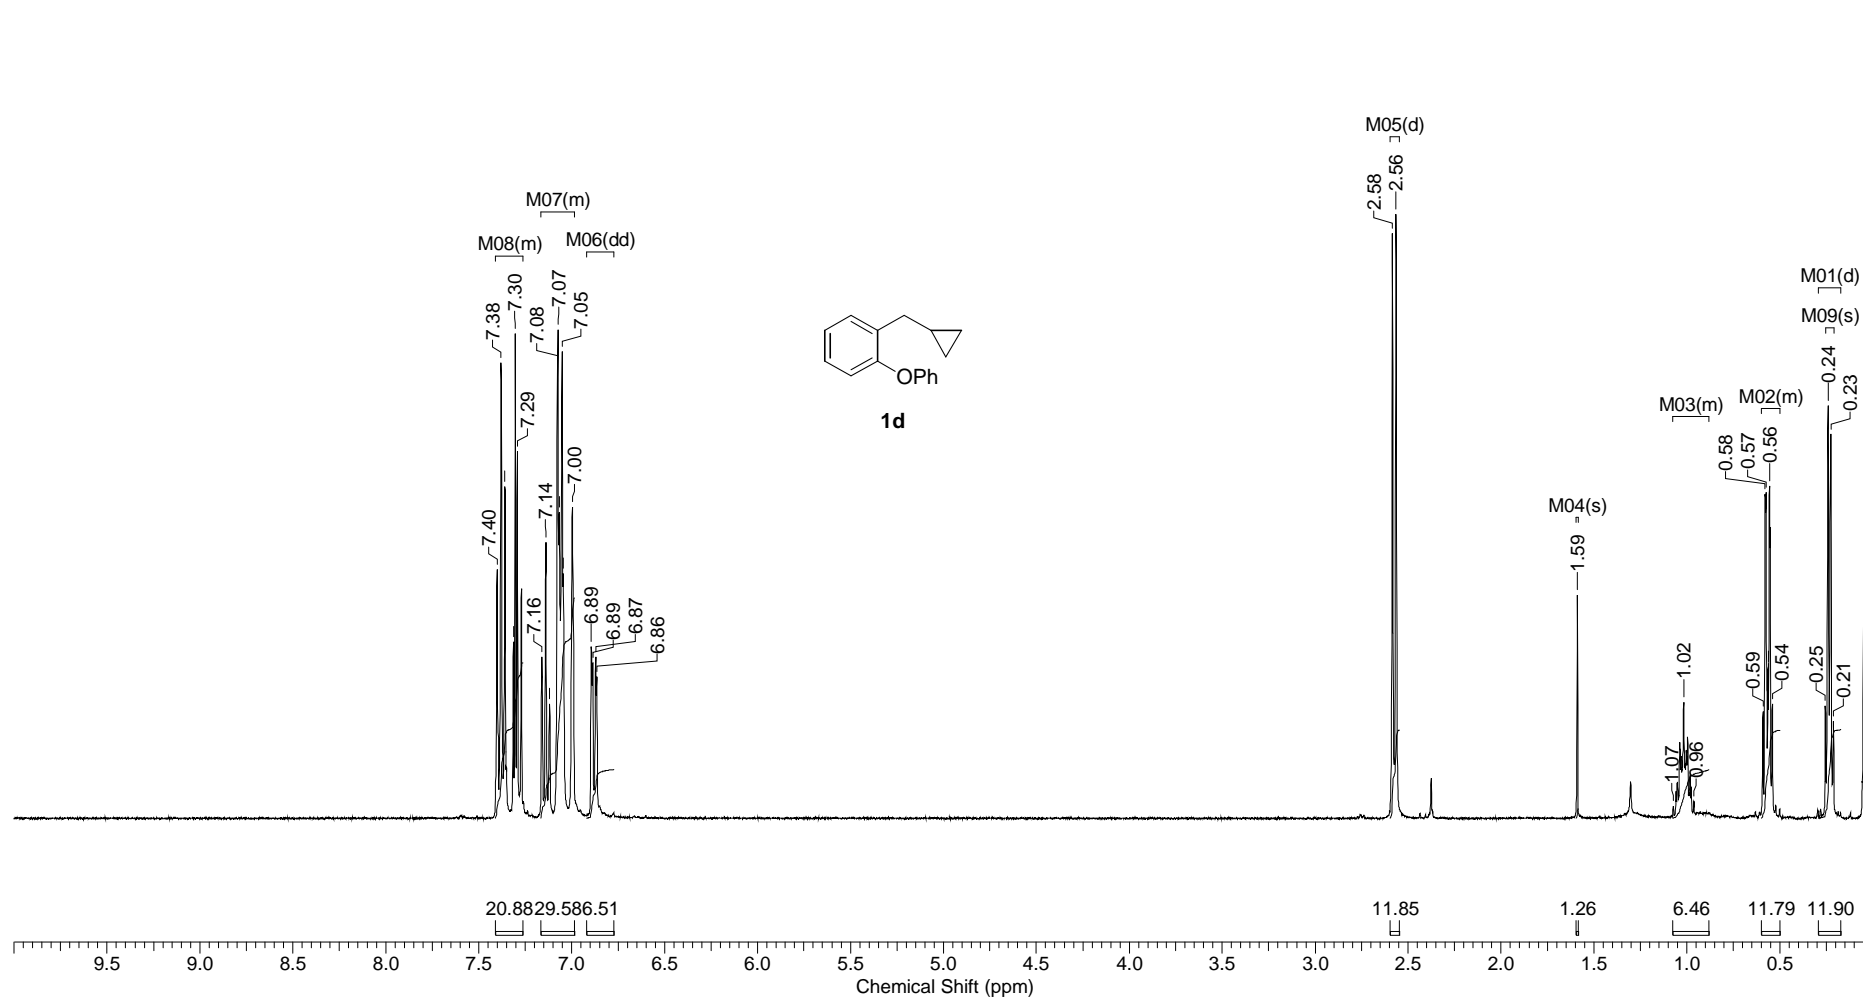

<sup>1</sup>H NMR (360 MHz, CDCl<sub>3</sub>) Spectrum of 1-cyclopropylmethyl-2-phenoxybenzene **1d**  
(Table 2, entry 3)

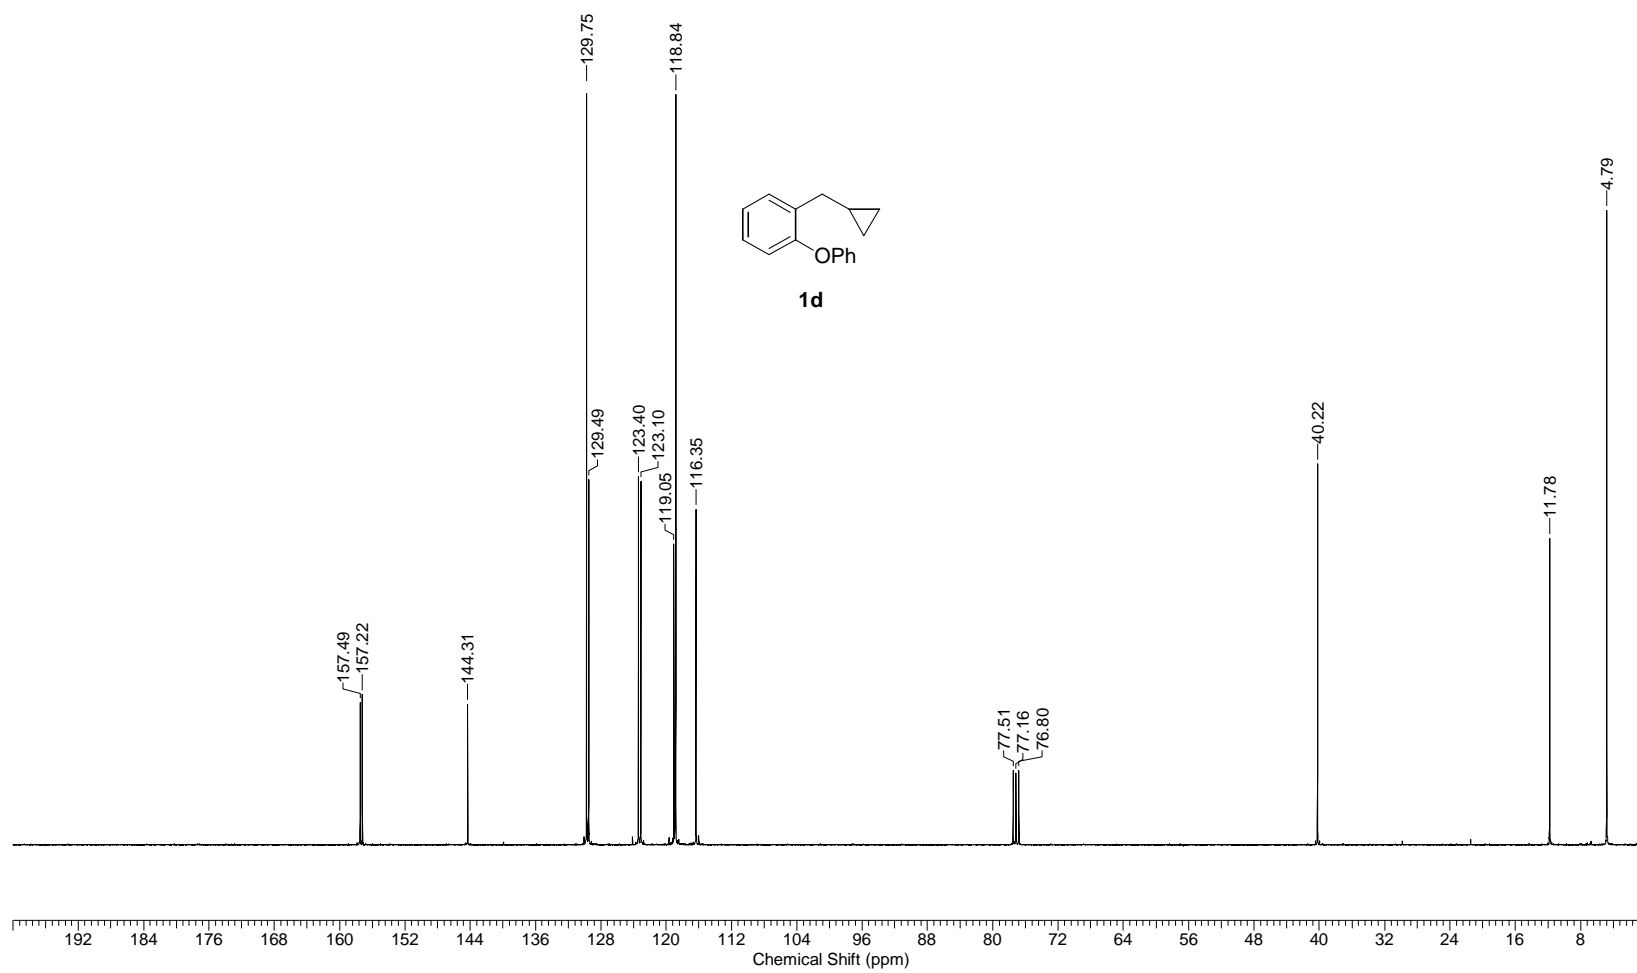

<sup>13</sup>C NMR (90 MHz, CDCl<sub>3</sub>) Spectrum of 1-Cyclopropylmethyl-2-phenoxybenzene **1d**  
(Table 2, entry 3)

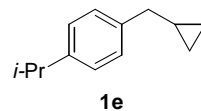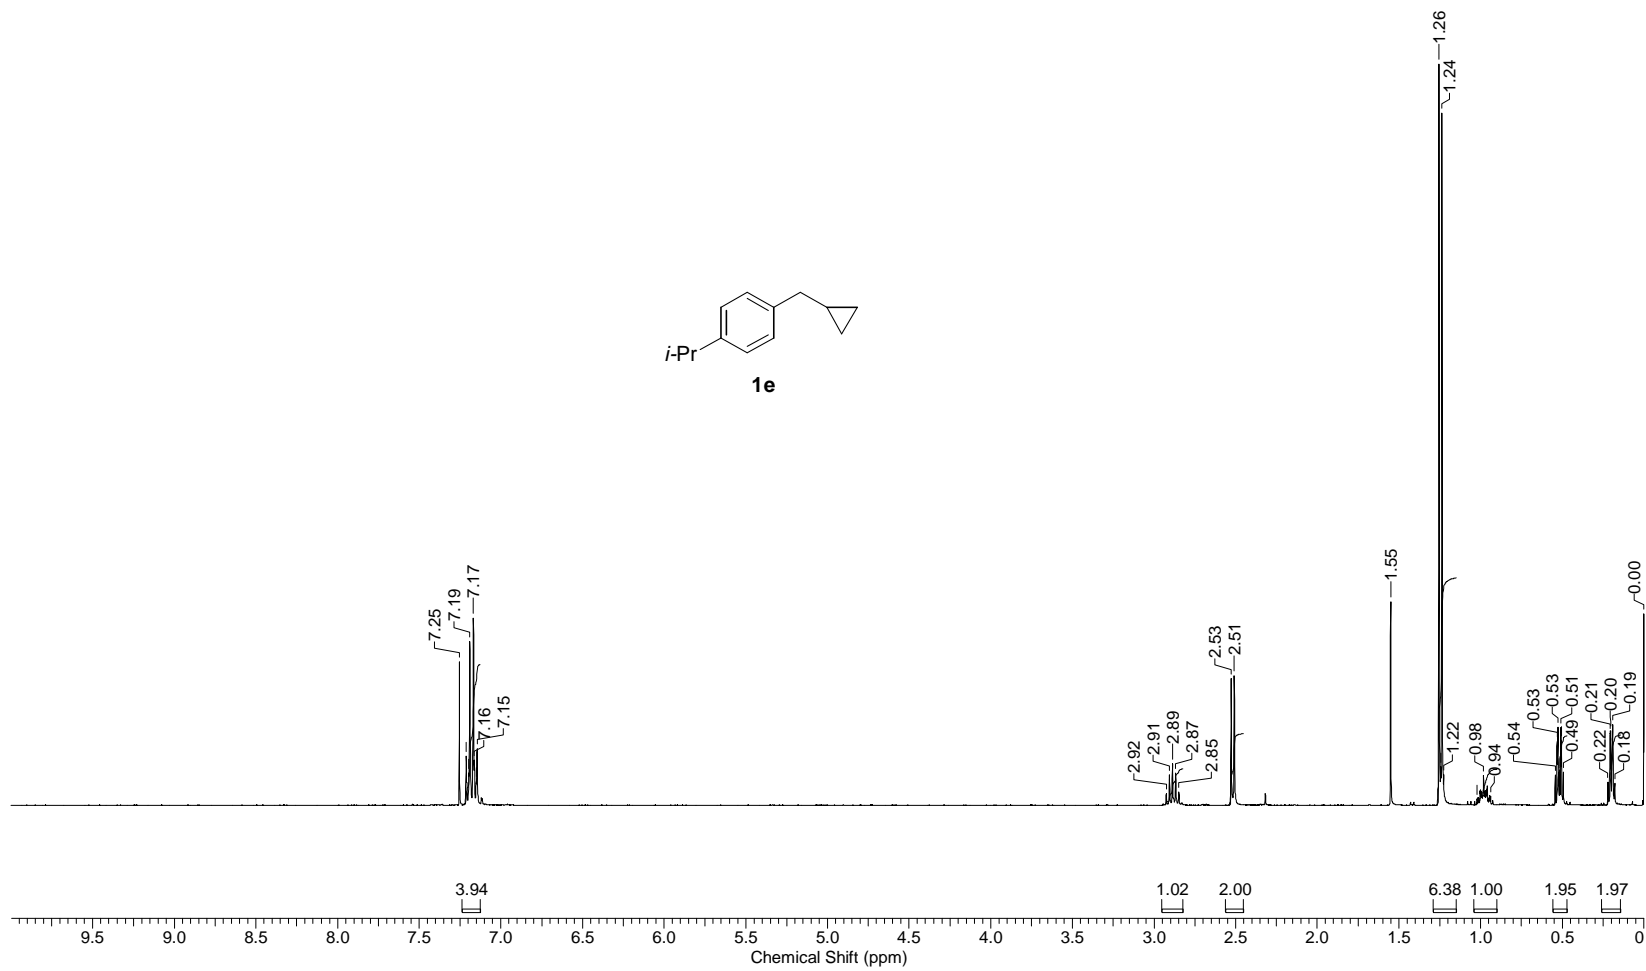

<sup>1</sup>H NMR (360 MHz, CDCl<sub>3</sub>) Spectrum of 1-cyclopropylmethyl-4-(propan-2-yl)benzene **1e**  
(Table 2, entry 4)



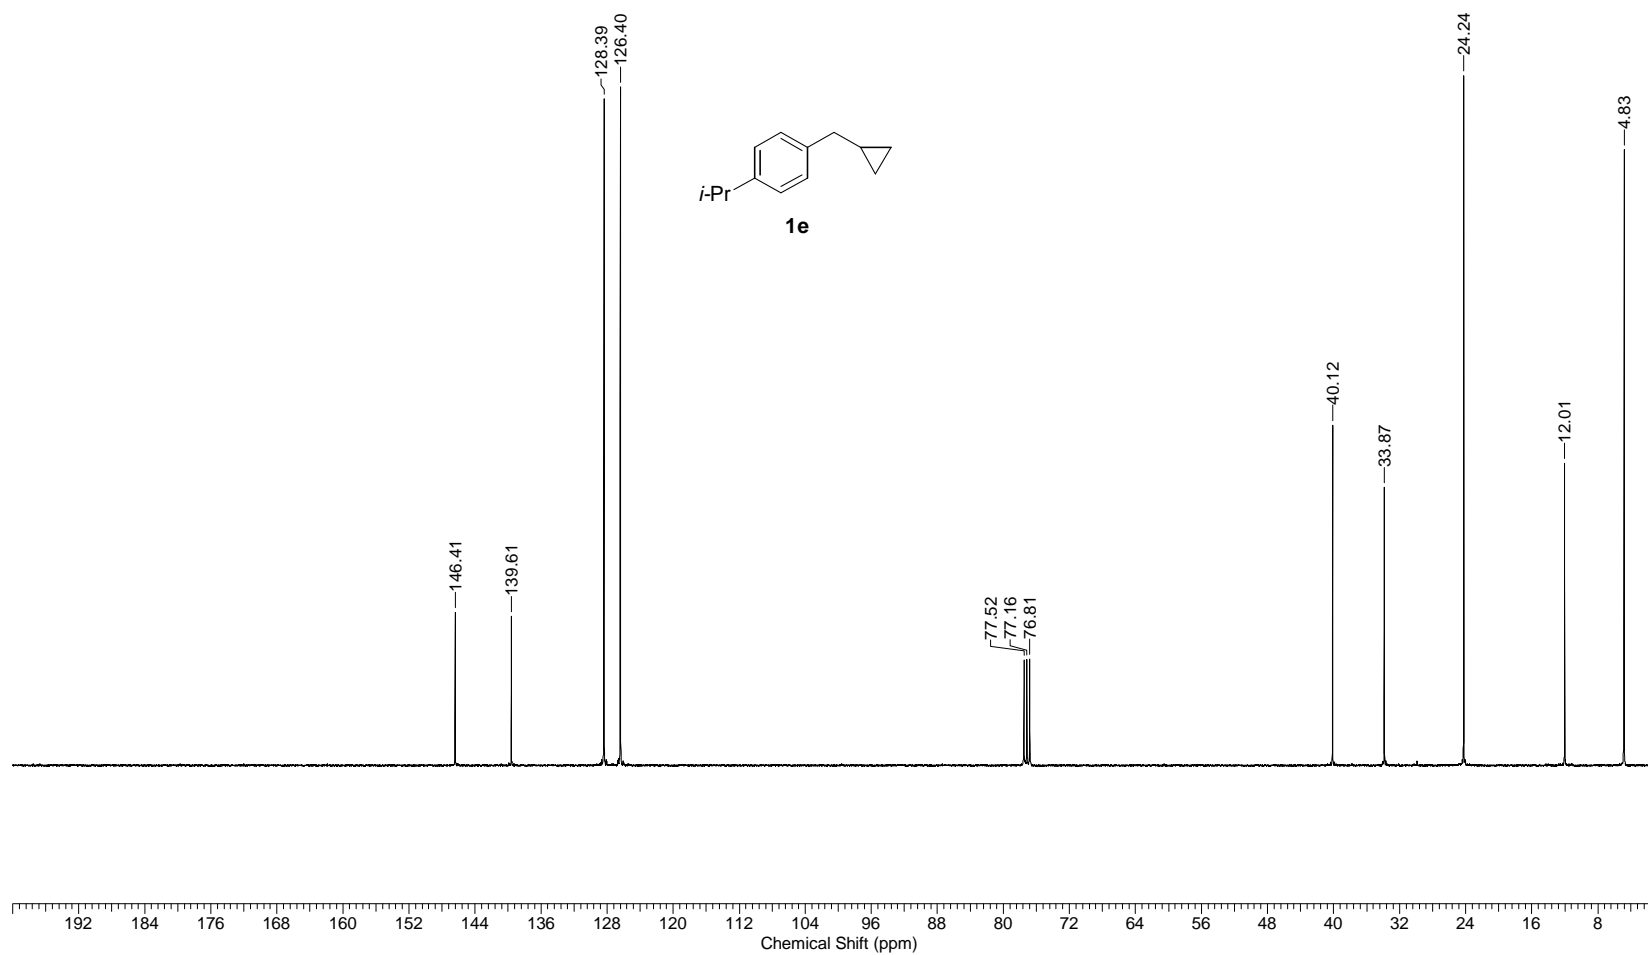

$^{13}\text{C}$  NMR (90 MHz,  $\text{CDCl}_3$ ) Spectrum of 1-cyclopropylmethyl-4-(propan-2-yl)benzene **1e**  
(Table 2, entry 4)

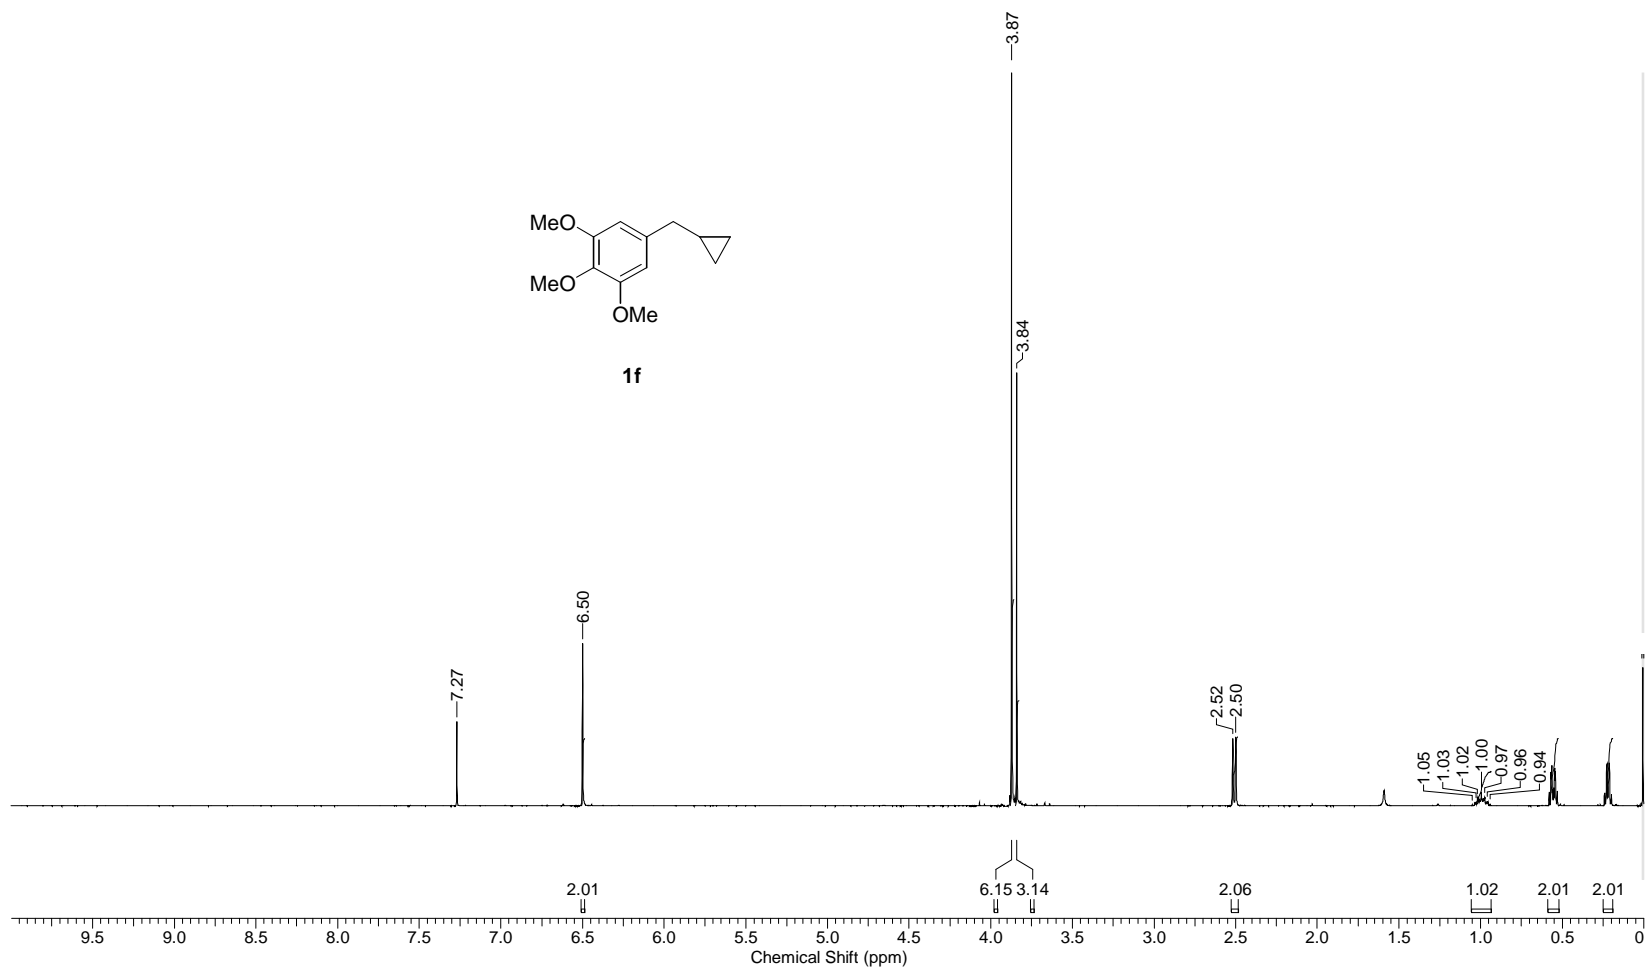

<sup>1</sup>H NMR (360 MHz, CDCl<sub>3</sub>) Spectrum of 5-cyclopropylmethyl-1,2,3-trimethoxybenzene **1f**  
(Table 2, entry 5)

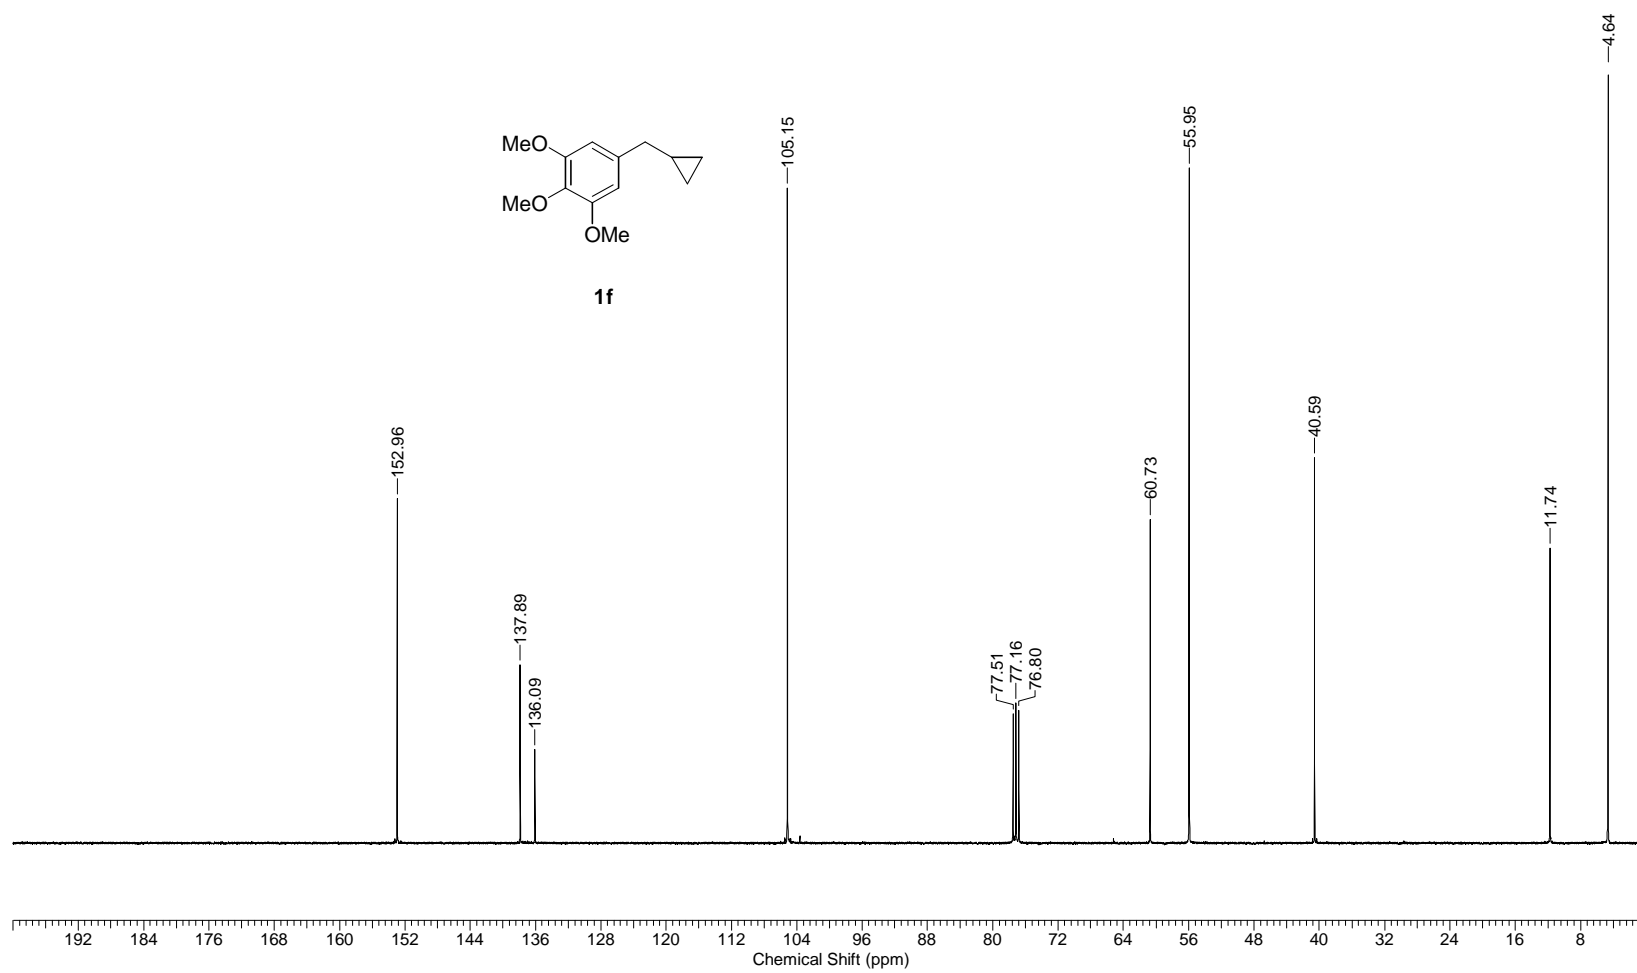

<sup>13</sup>C NMR (90 MHz, CDCl<sub>3</sub>) Spectrum of 5-cyclopropylmethyl-1,2,3-trimethoxybenzene **1f**  
(Table 2, entry 5)

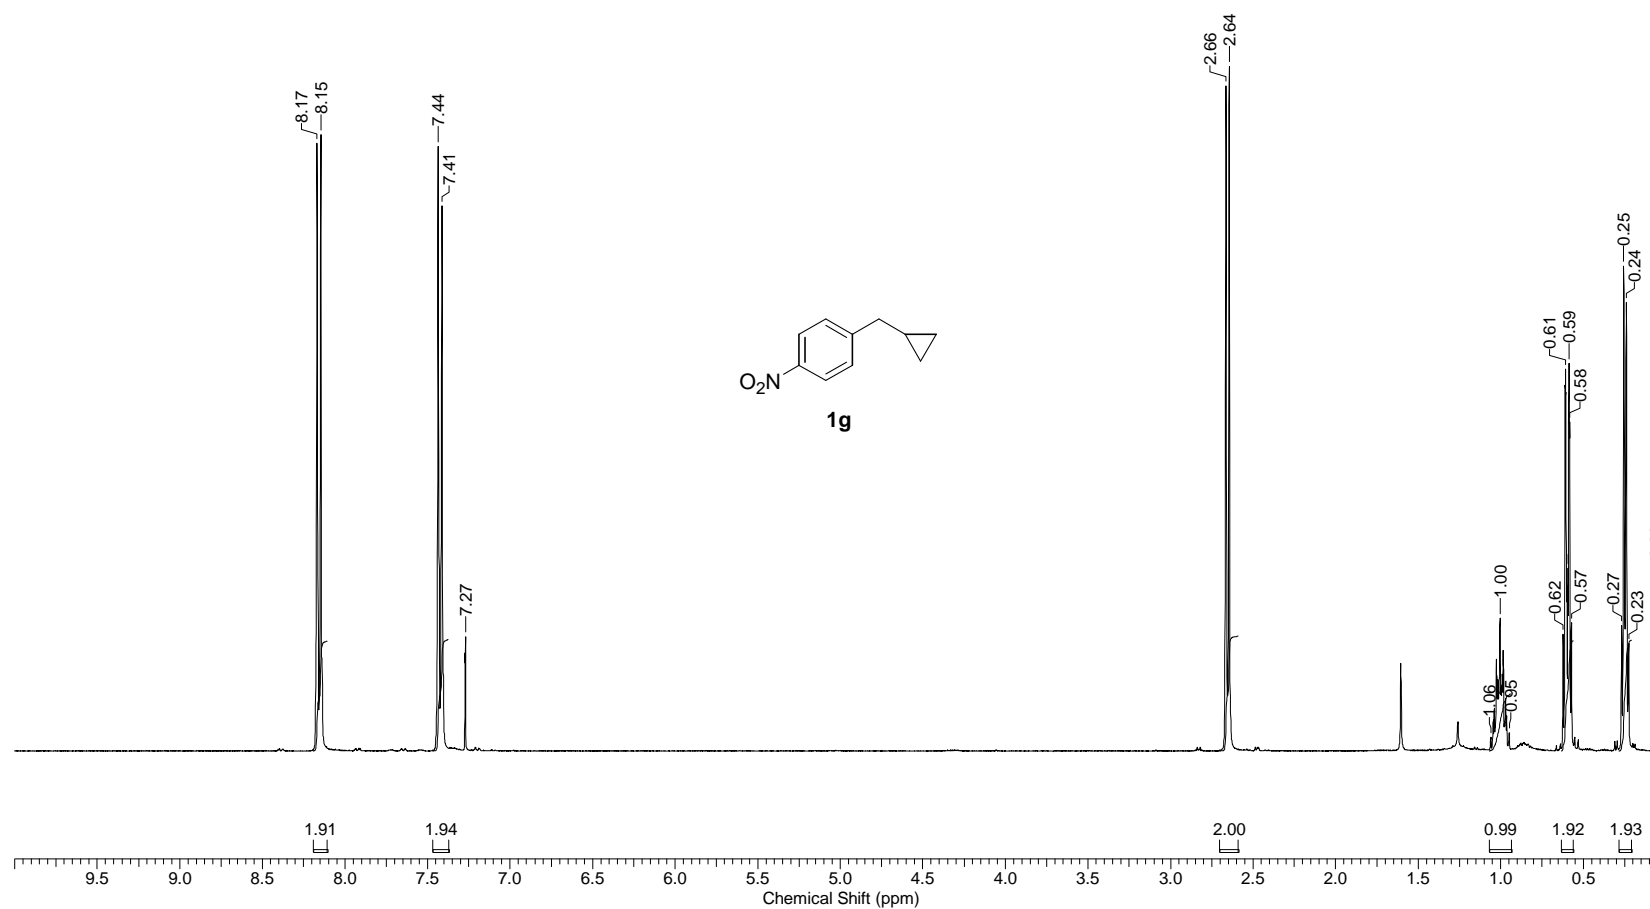

$^1\text{H}$  NMR (360 MHz,  $\text{CDCl}_3$ ) Spectrum of 1-cyclopropylmethyl-4-nitrobenzene **1g**  
(Table 2, entry 6)

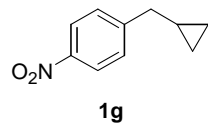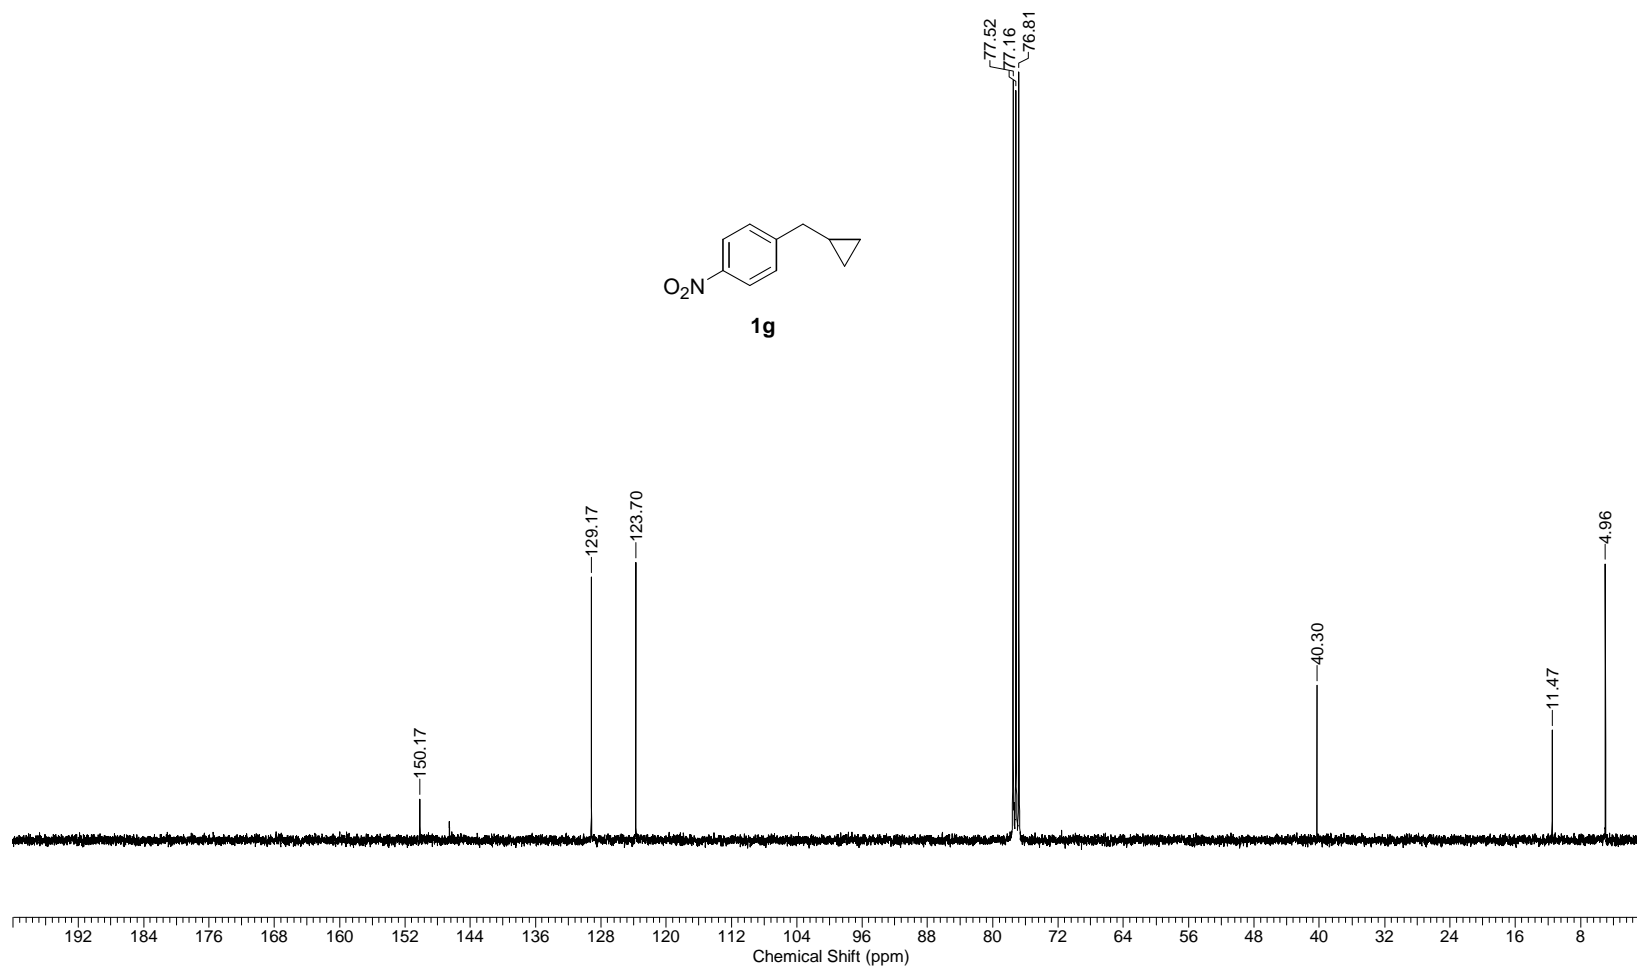

<sup>13</sup>C NMR (90 MHz, CDCl<sub>3</sub>) Spectrum of 1-cyclopropylmethyl-4-nitrobenzene **1g**  
(Table 2, entry 6)

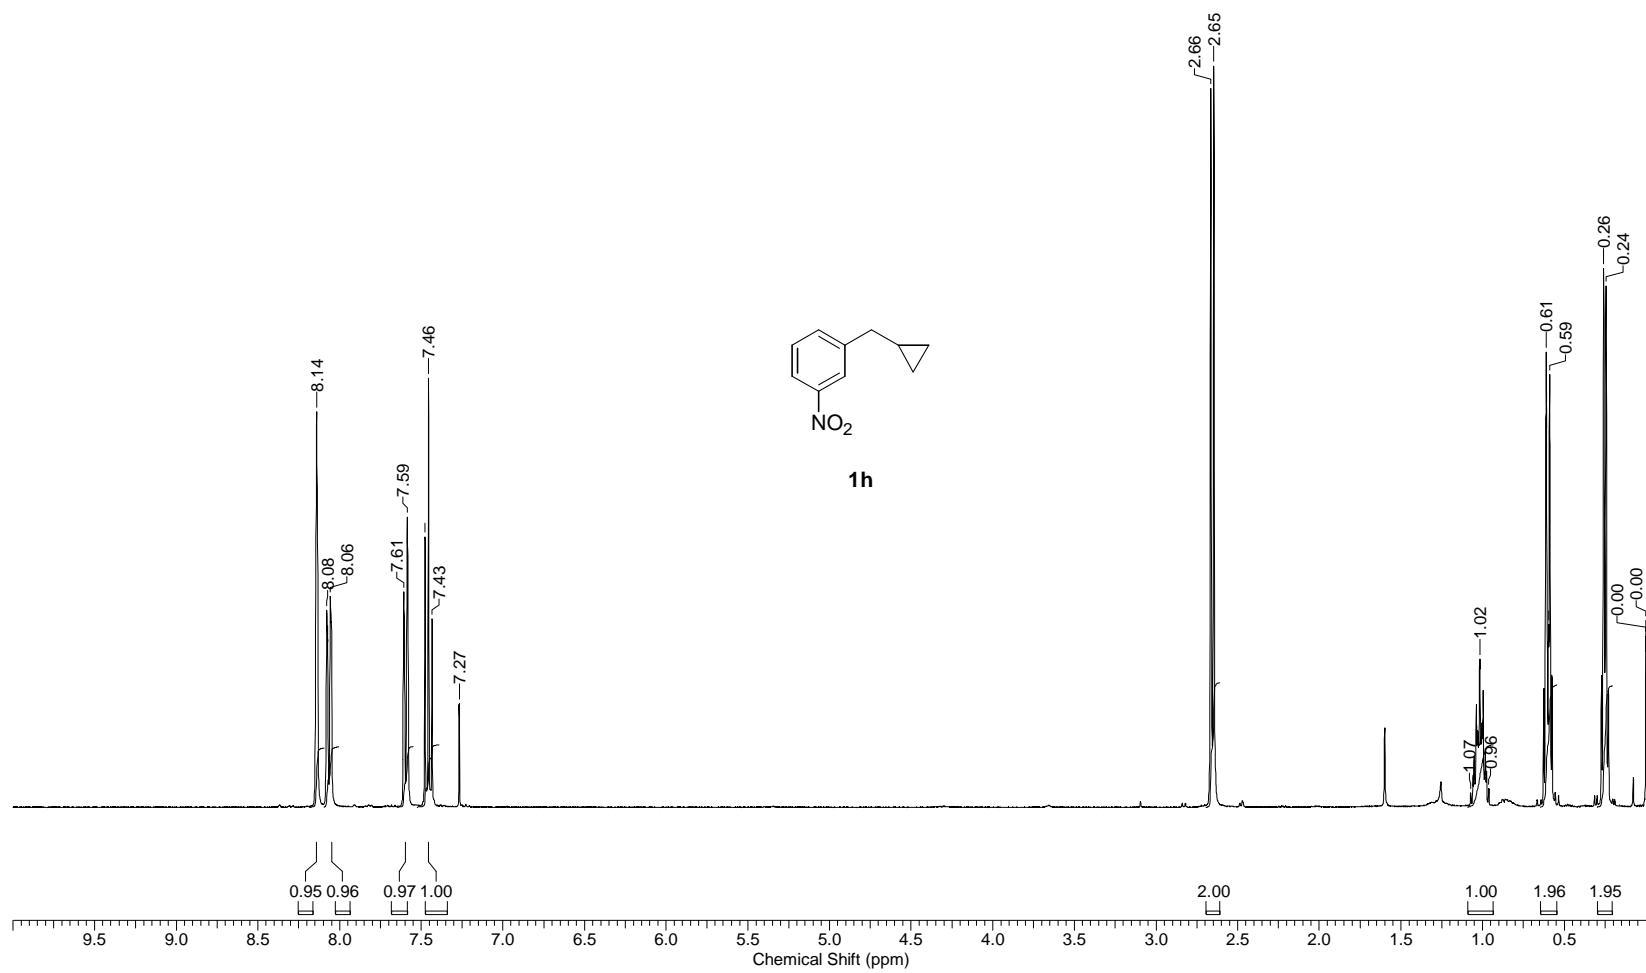

<sup>1</sup>H NMR (360 MHz, CDCl<sub>3</sub>) Spectrum of 1-cyclopropylmethyl-3-nitrobenzene **1h**  
(Table 2, entry 7)

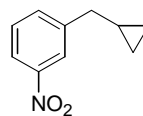

**1h**

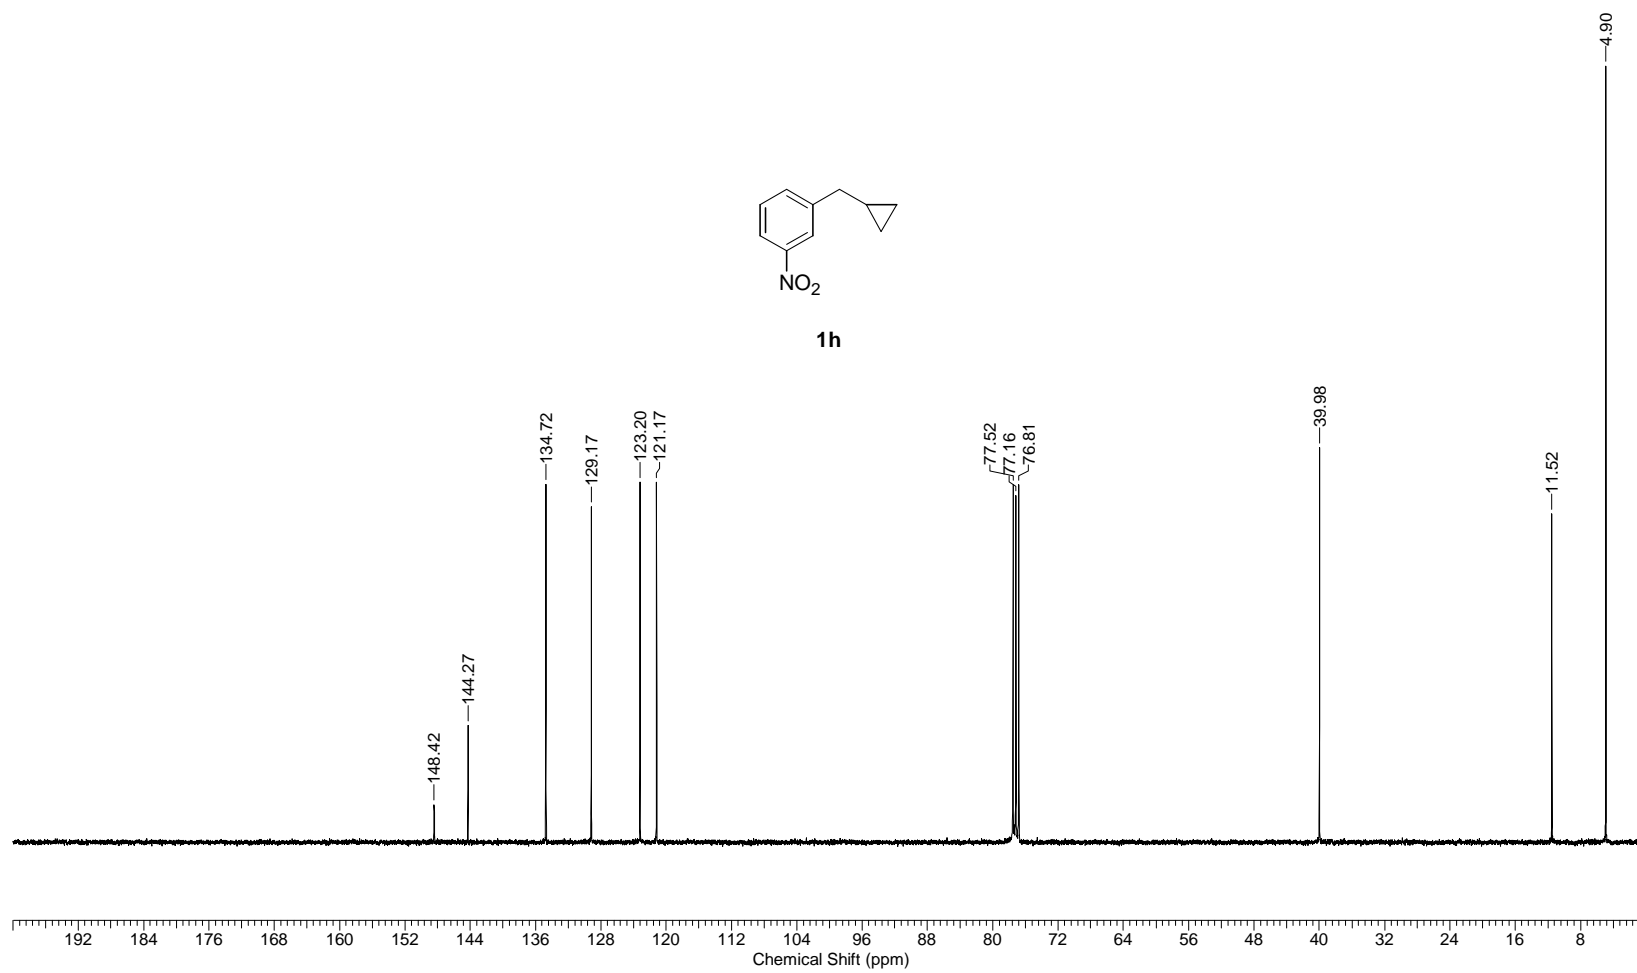

<sup>13</sup>C NMR (90 MHz, CDCl<sub>3</sub>) Spectrum of 1-cyclopropylmethyl-3-nitrobenzene **1h**  
(Table 2, entry 7)

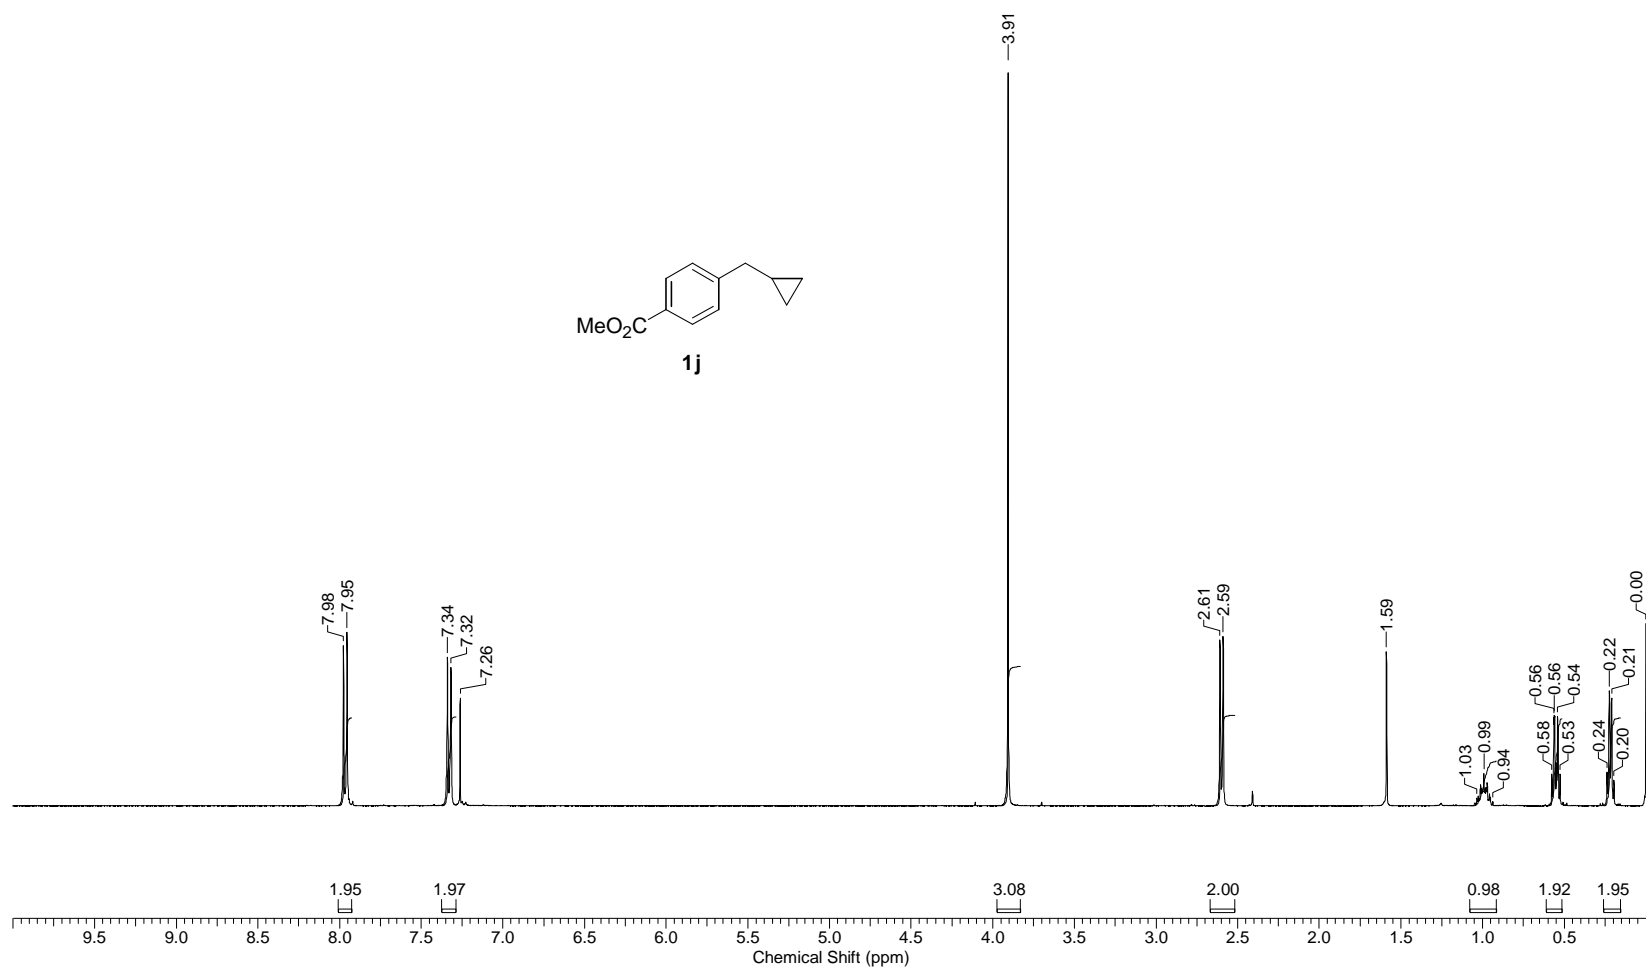

<sup>1</sup>H NMR (360 MHz, CDCl<sub>3</sub>) Spectrum of 4-cyclopropylmethylbenzoic acid, methyl ester **1j**  
(Table 2, entry 9)



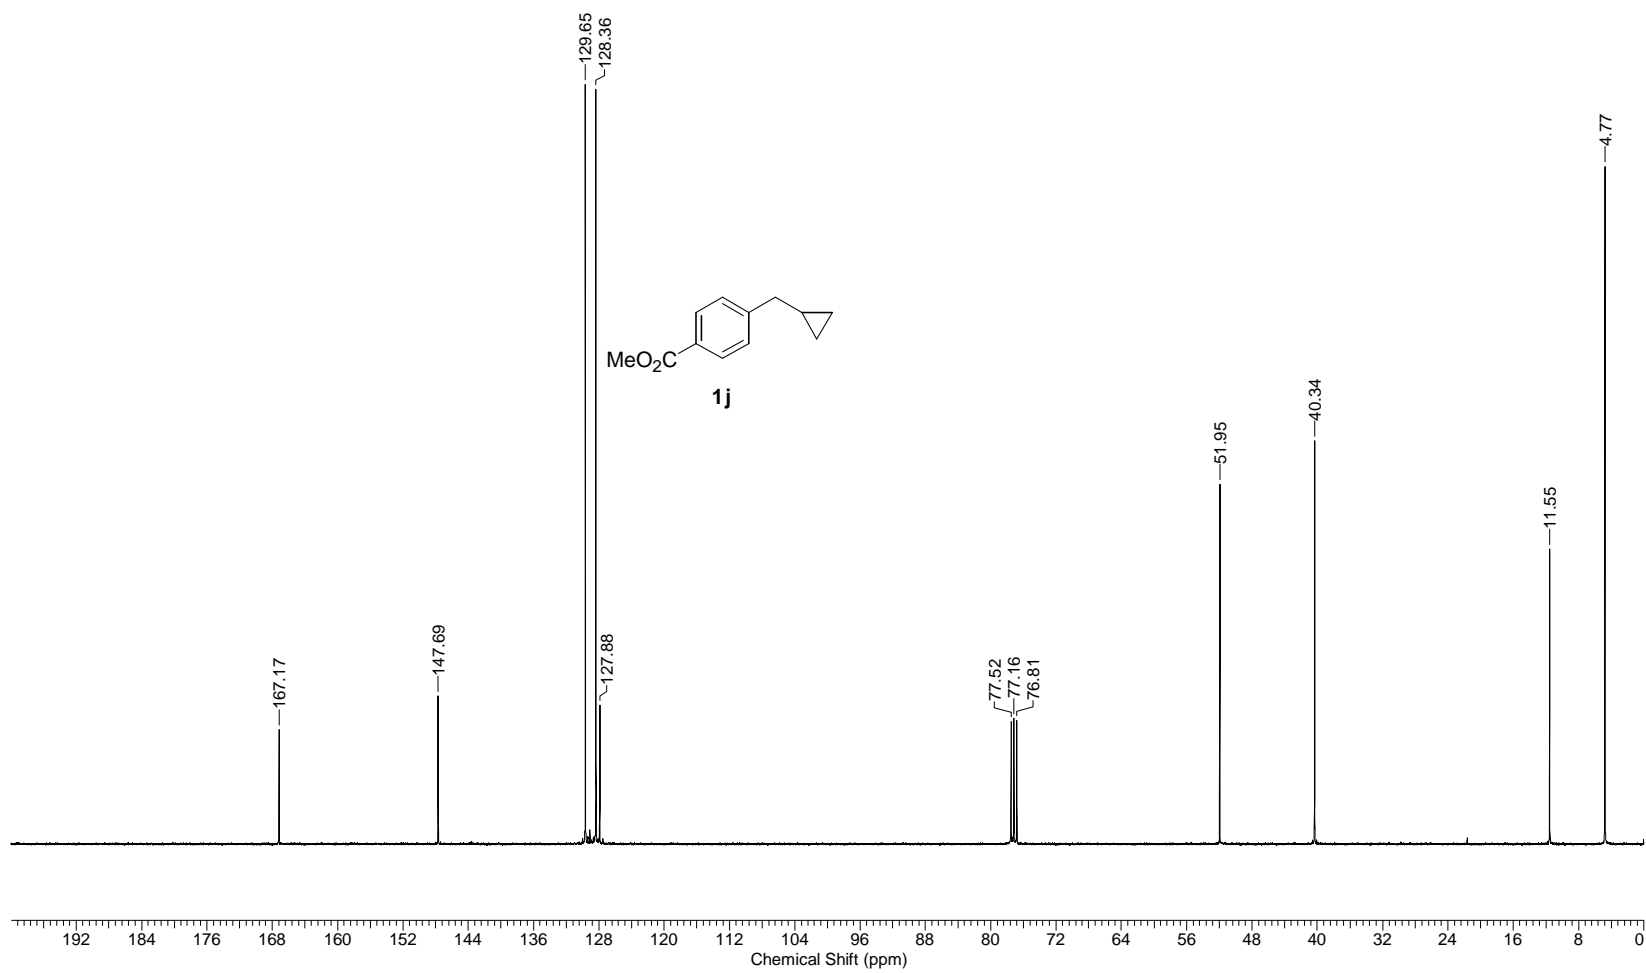

$^{13}\text{C}$  NMR (90 MHz,  $\text{CDCl}_3$ ) Spectrum of 4-cyclopropylmethylbenzoic acid, methyl ester **1j**  
(Table 2, entry 9)

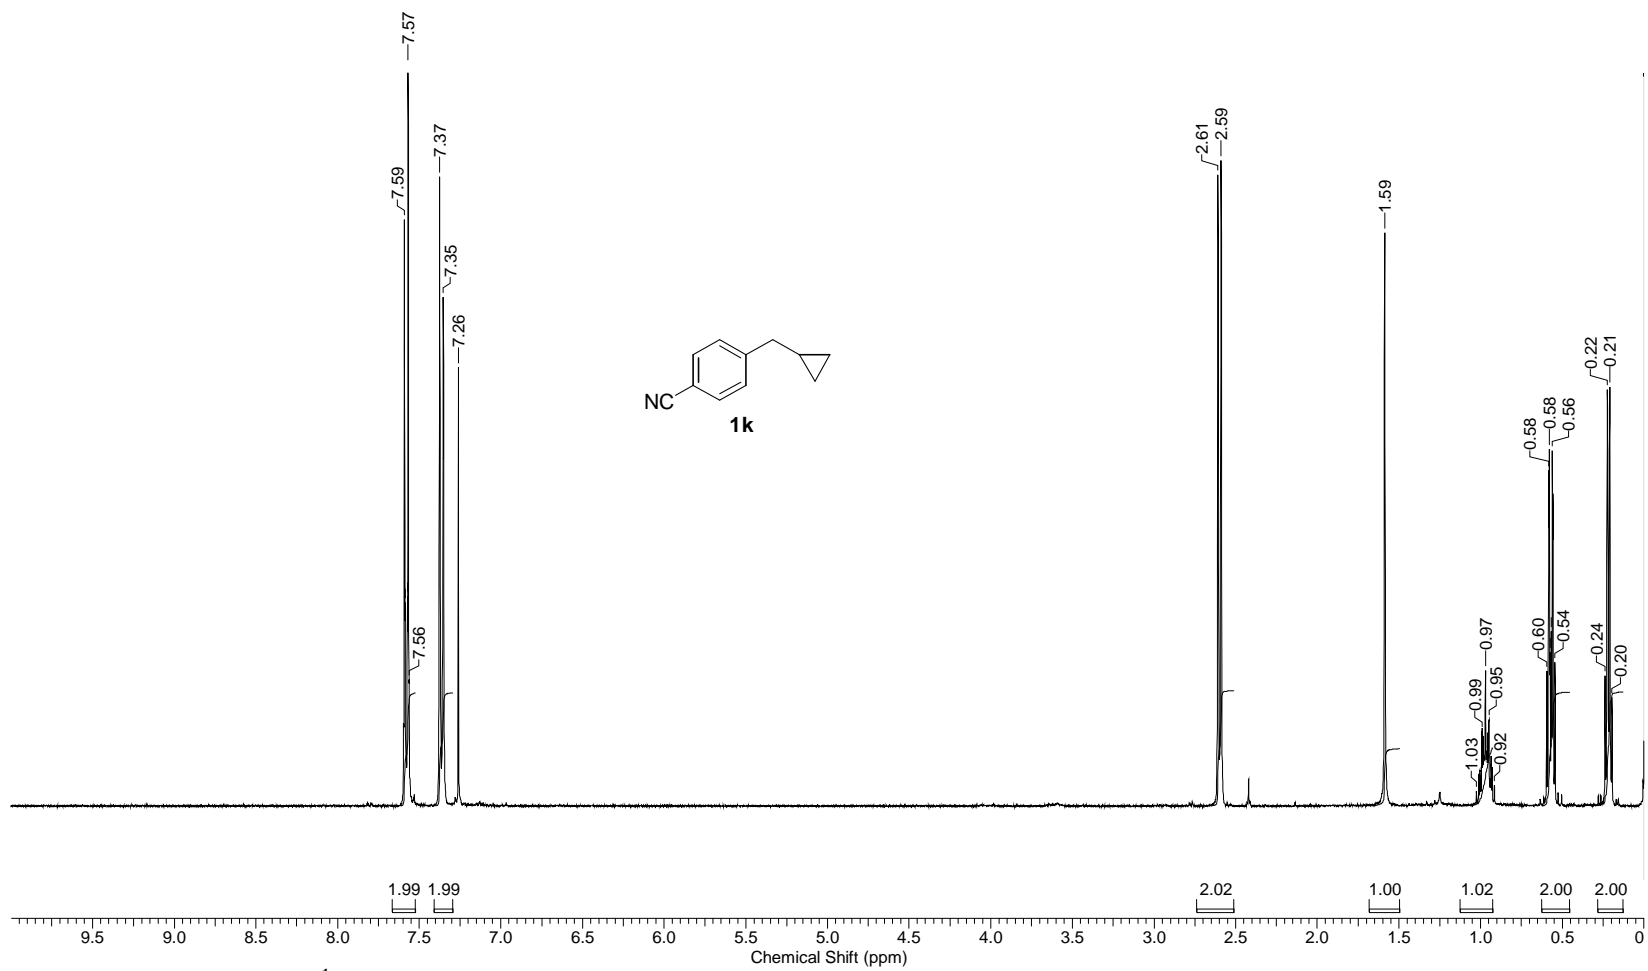

<sup>1</sup>H NMR (360 MHz, CDCl<sub>3</sub>) Spectrum of 4-cyclopropylmethyl-benzonitrile **1k**  
(Table 10, entry 10)

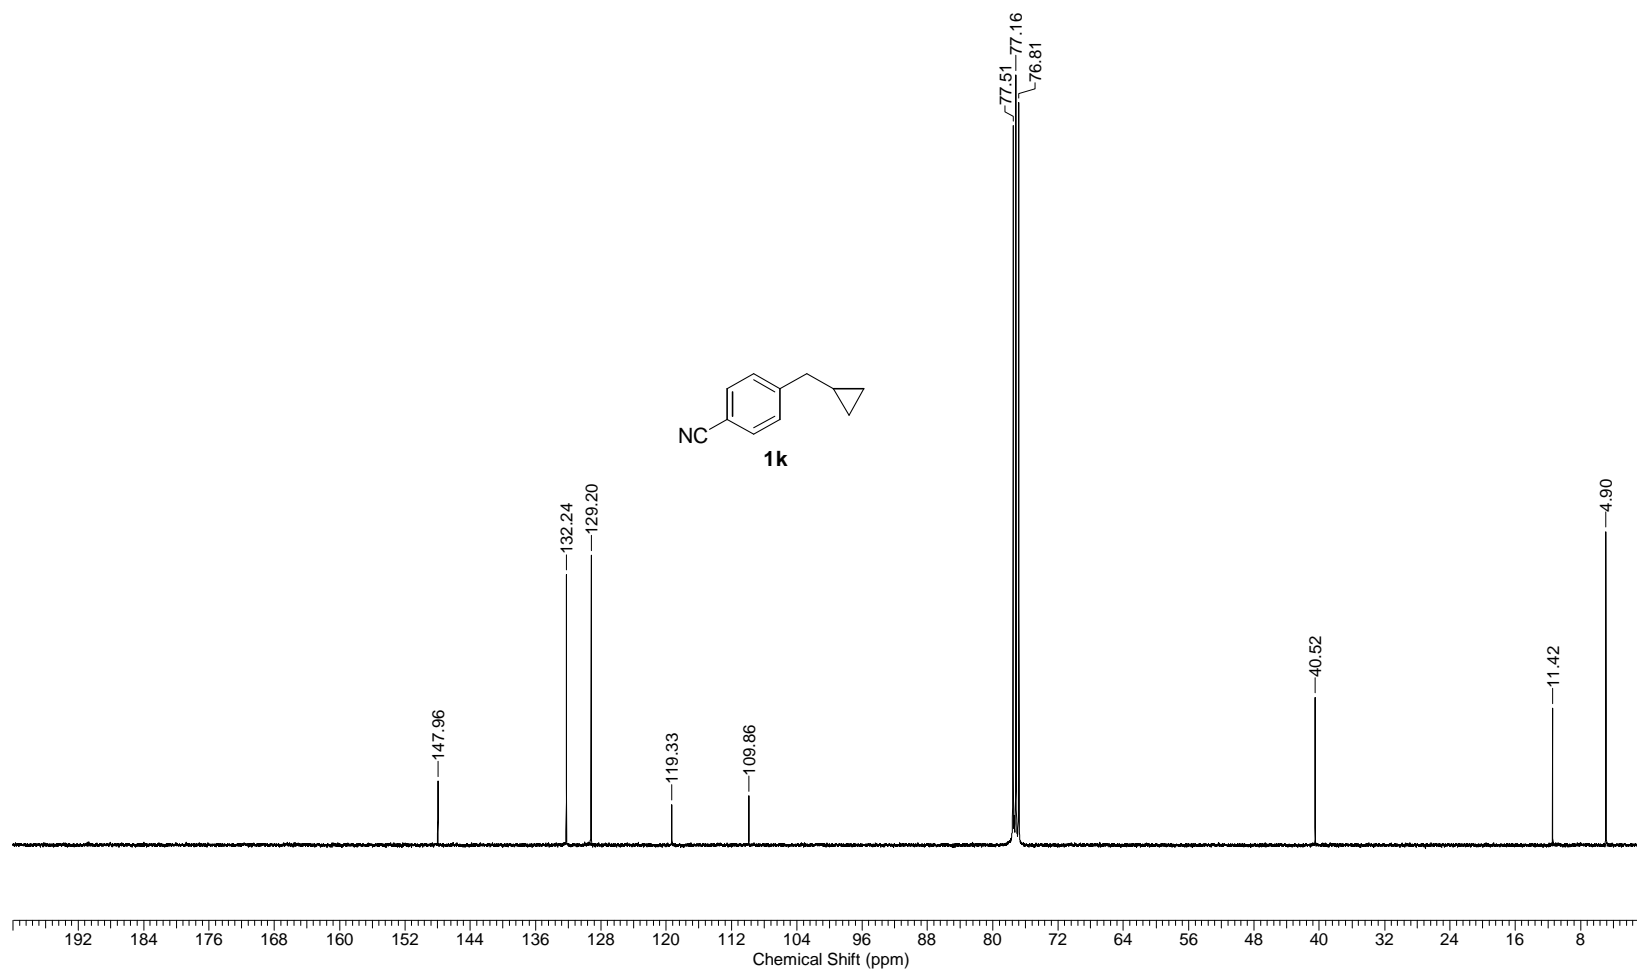

$^{13}\text{C}$  NMR (90 MHz,  $\text{CDCl}_3$ ) Spectrum of 4-cyclopropylmethyl-benzonitrile **1k**  
(Table 10, entry 10)

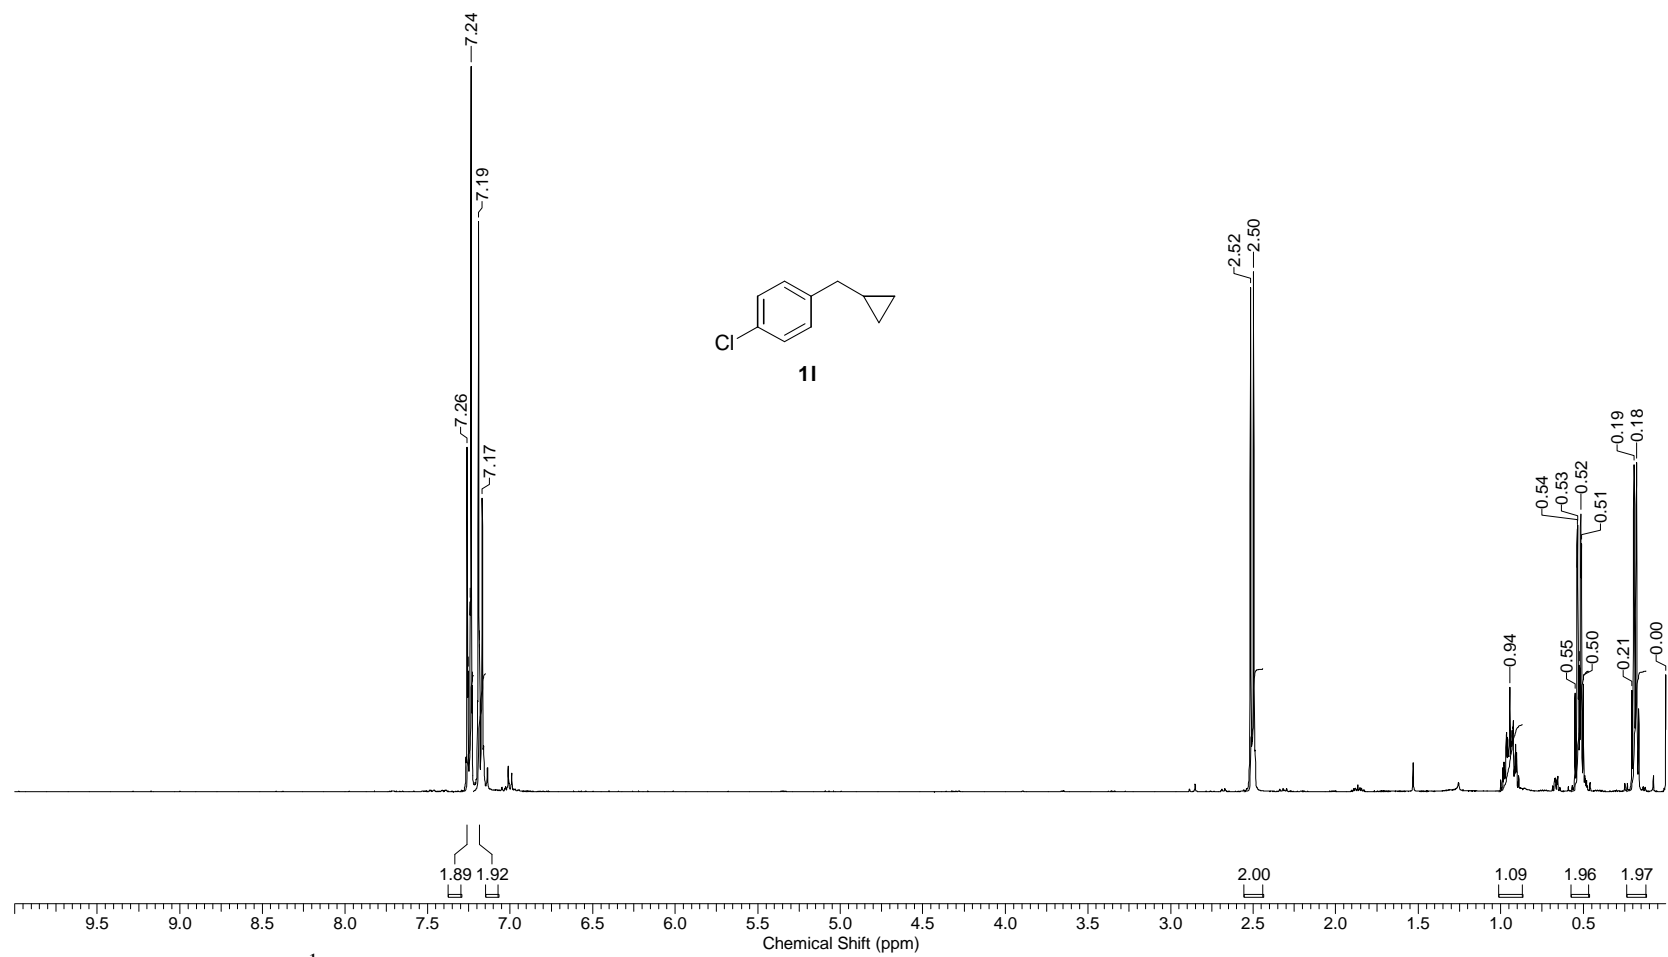

<sup>1</sup>H NMR (360 MHz, CDCl<sub>3</sub>) Spectrum of 1-chloro-4-cyclopropylmethylbenzene **11**  
(Table 2, entry 11)

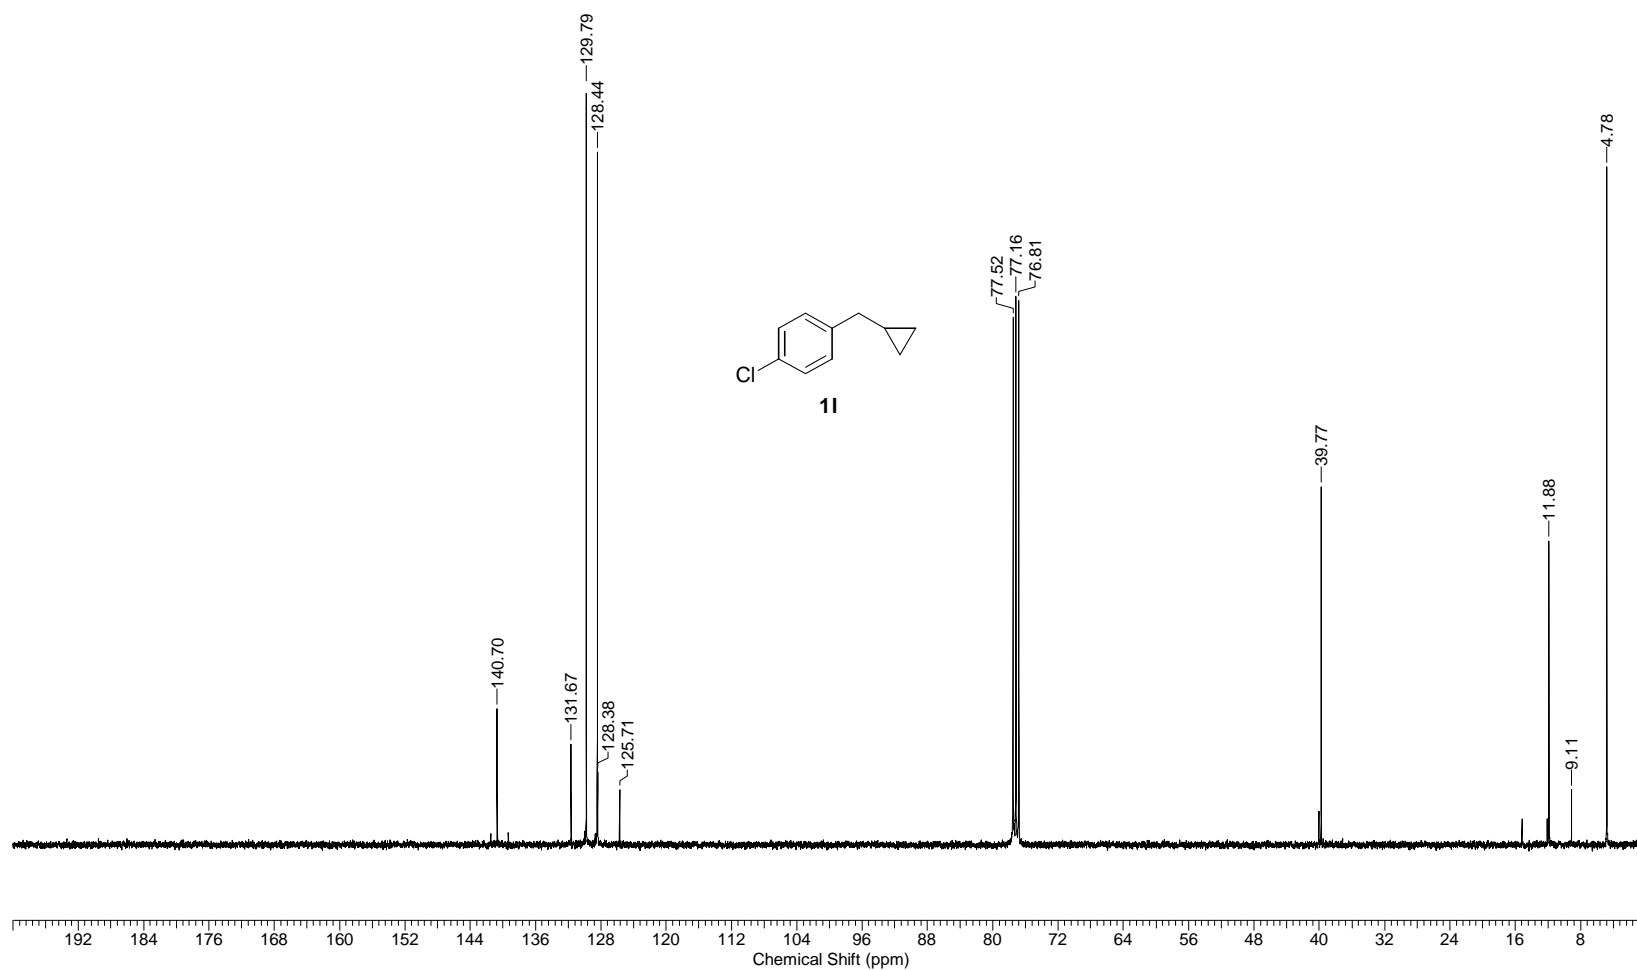

$^{13}\text{C}$  NMR (90 MHz,  $\text{CDCl}_3$ ) Spectrum of 1-chloro-4-cyclopropylmethylbenzene **11**  
(Table 2, entry 11)

$^1\text{H}$  and  $^{13}\text{C}$  NMR spectra of compounds 2a-g

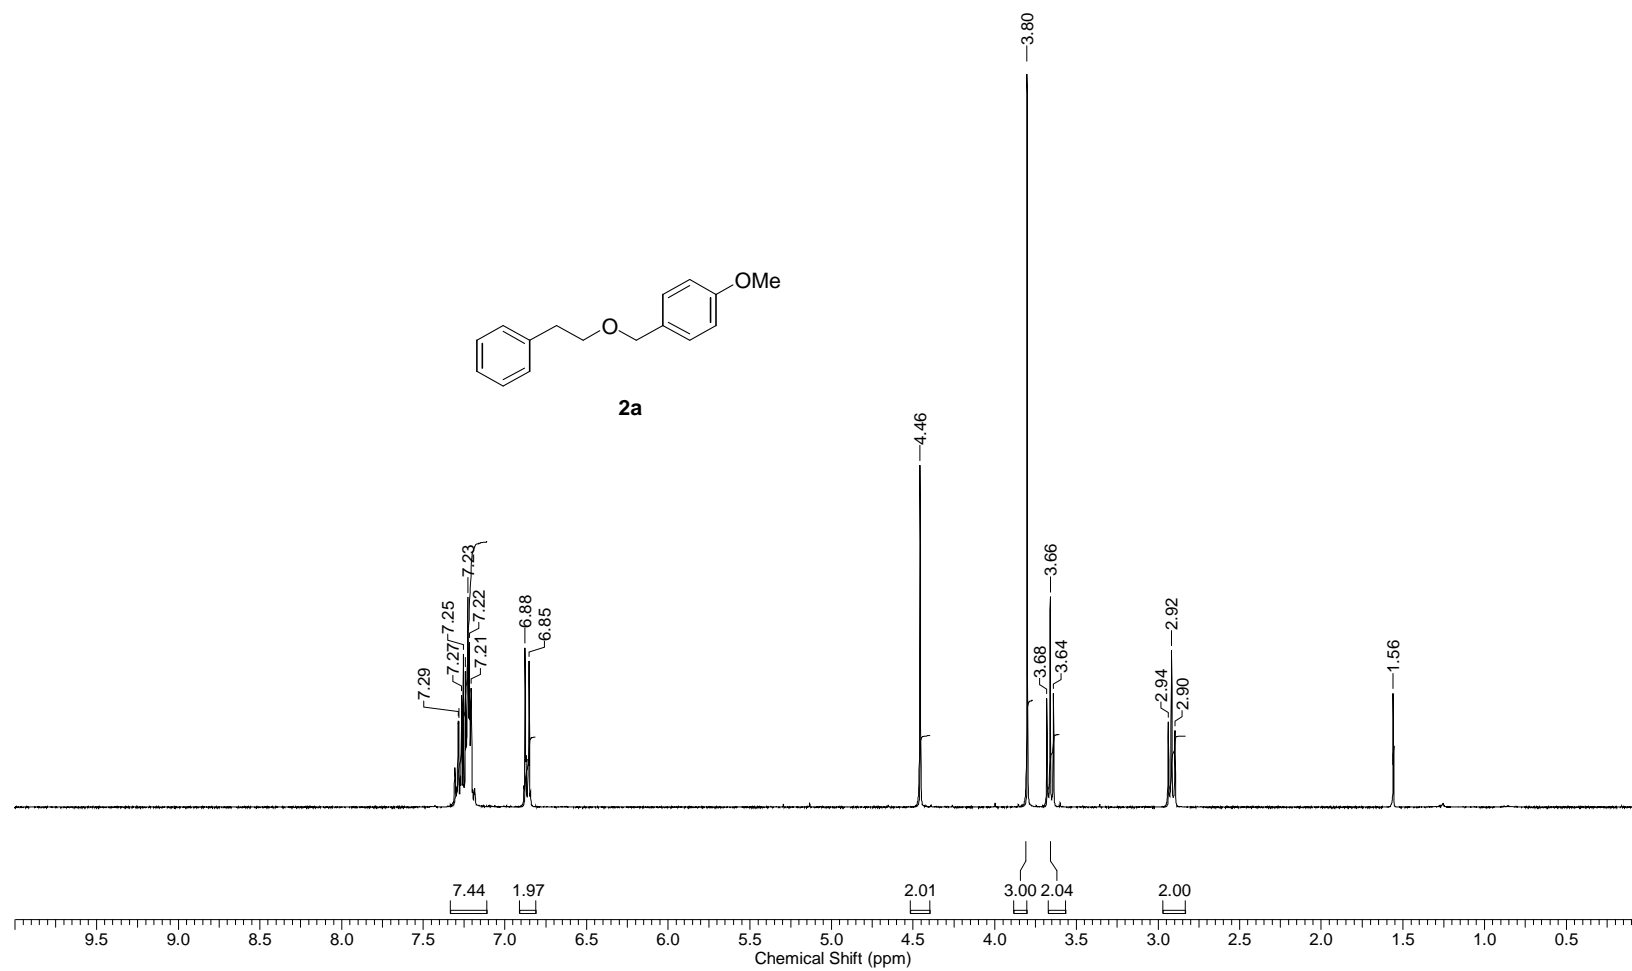

$^1\text{H}$  NMR (360 MHz,  $\text{CDCl}_3$ ) Spectrum of 1-methoxy-4-phenethylbenzene **2a**  
(Table 3, entry 1)

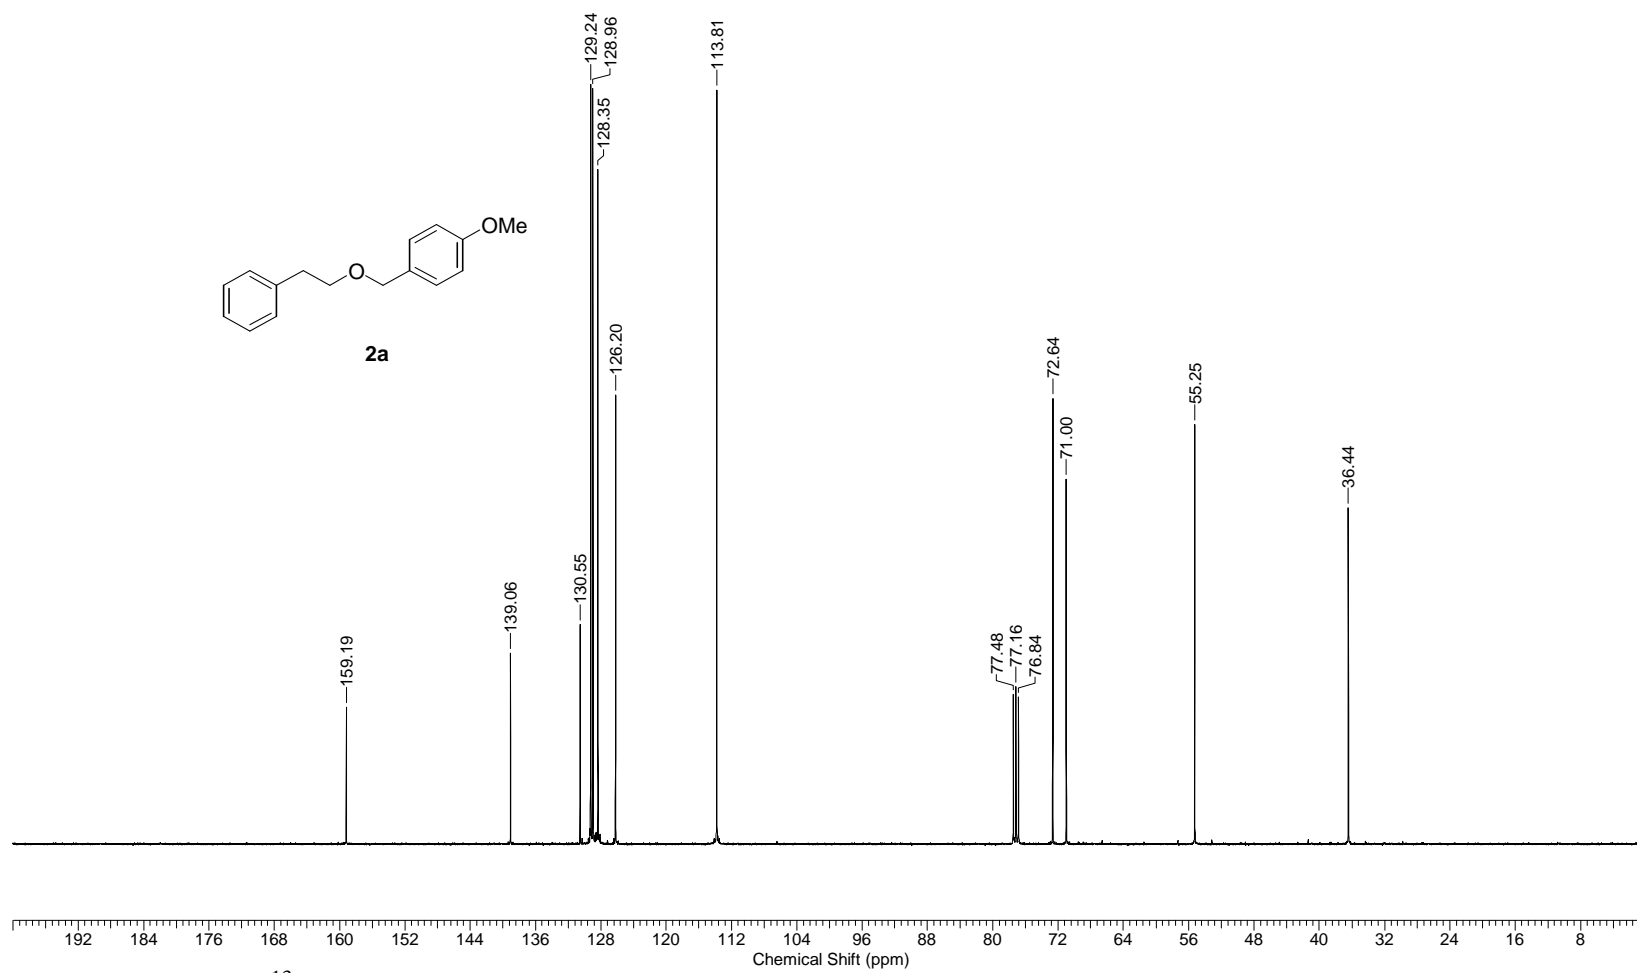

<sup>13</sup>C NMR (90 MHz, CDCl<sub>3</sub>) Spectrum of 1-methoxy-4-phenethylbenzene **2a**  
(Table 3, entry 1)

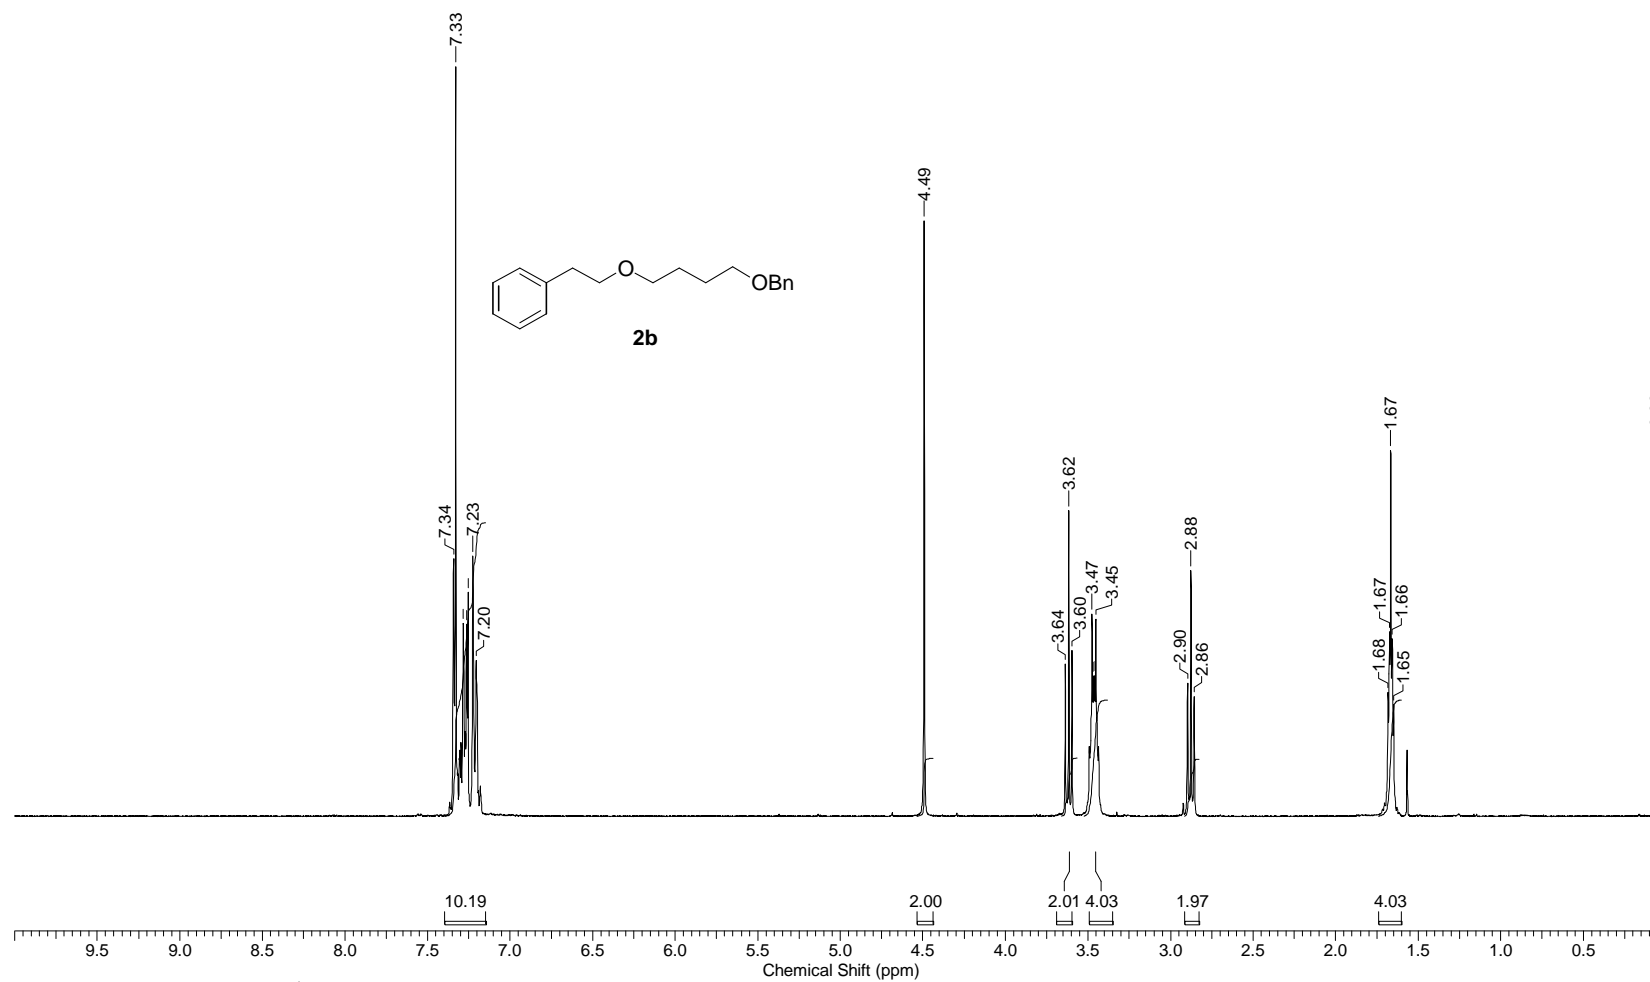

$^1\text{H}$  NMR (360 MHz,  $\text{CDCl}_3$ ) Spectrum of [4-(2-phenylethoxy)butoxy]methyl)benzene **2b**  
(Table ,3 entry 2)



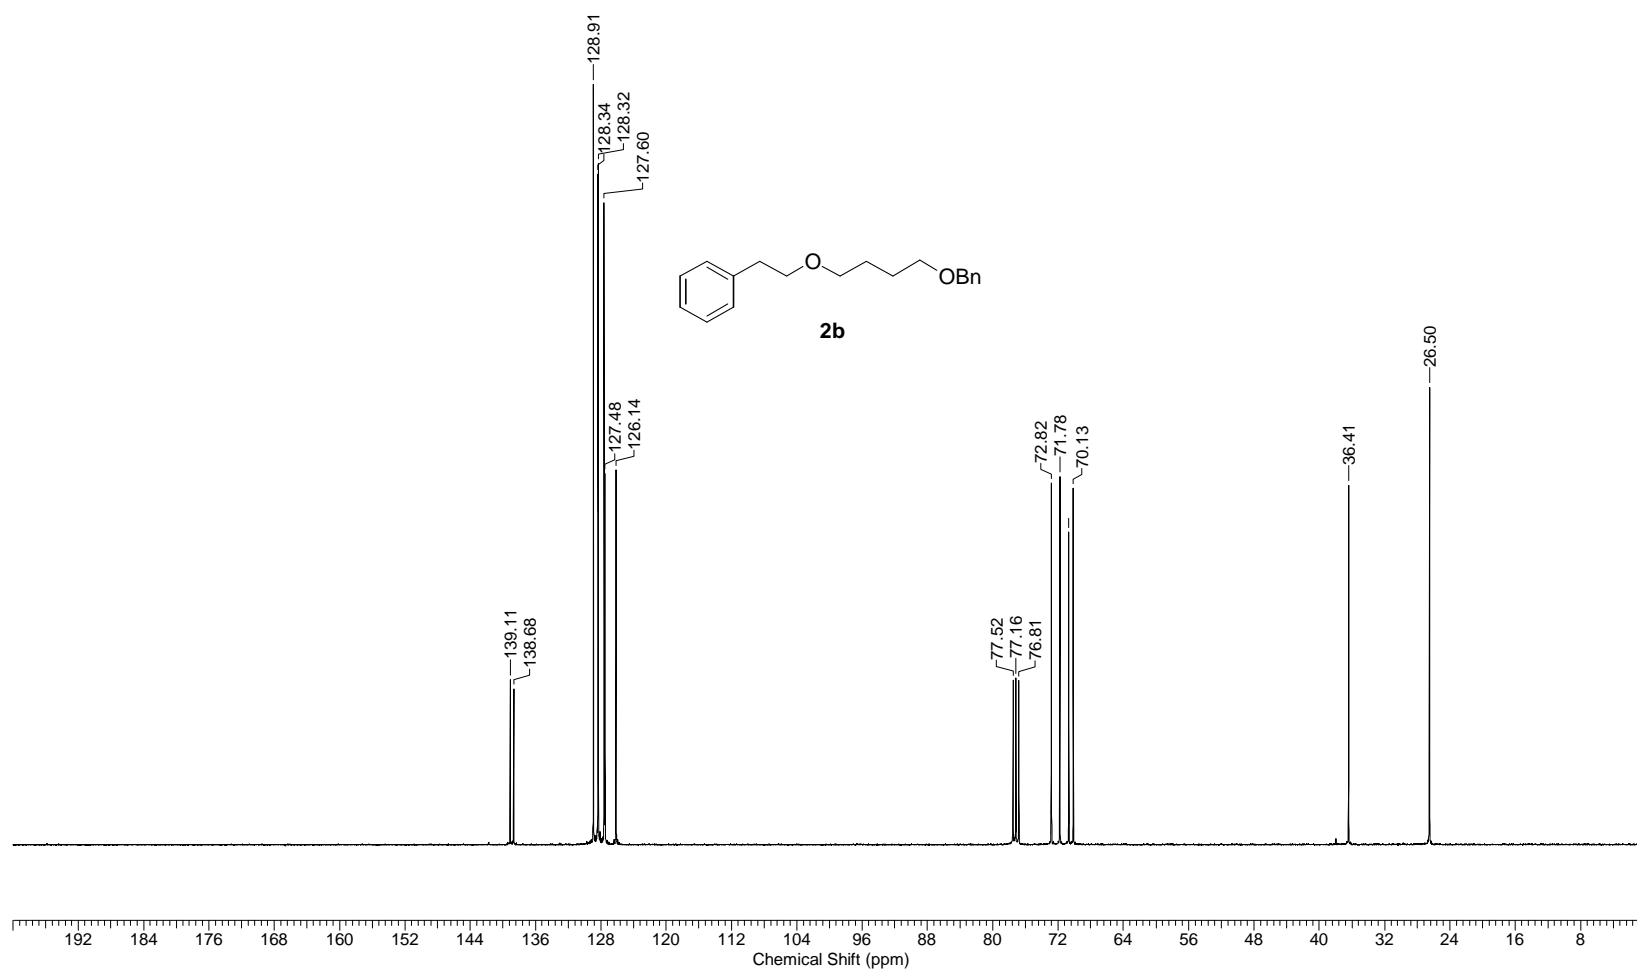

<sup>13</sup>C NMR (90 MHz, CDCl<sub>3</sub>) Spectrum of [4-(2-phenylethoxy)butoxy]methylbenzene **2b**  
(Table ,3 entry 2)

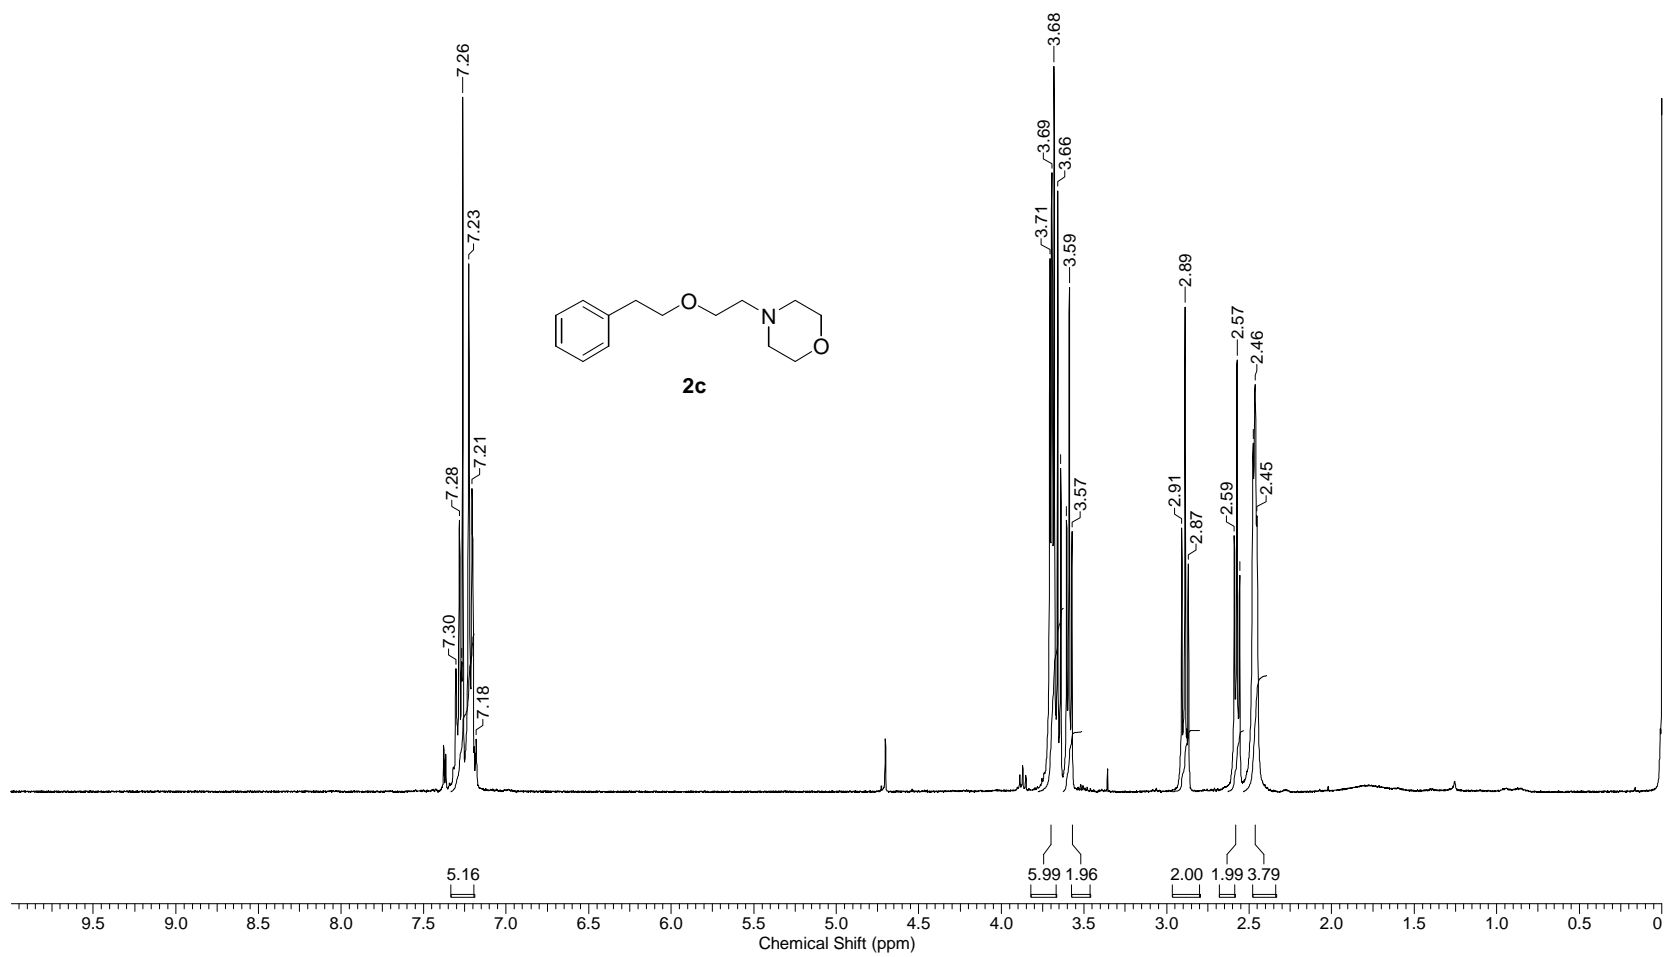

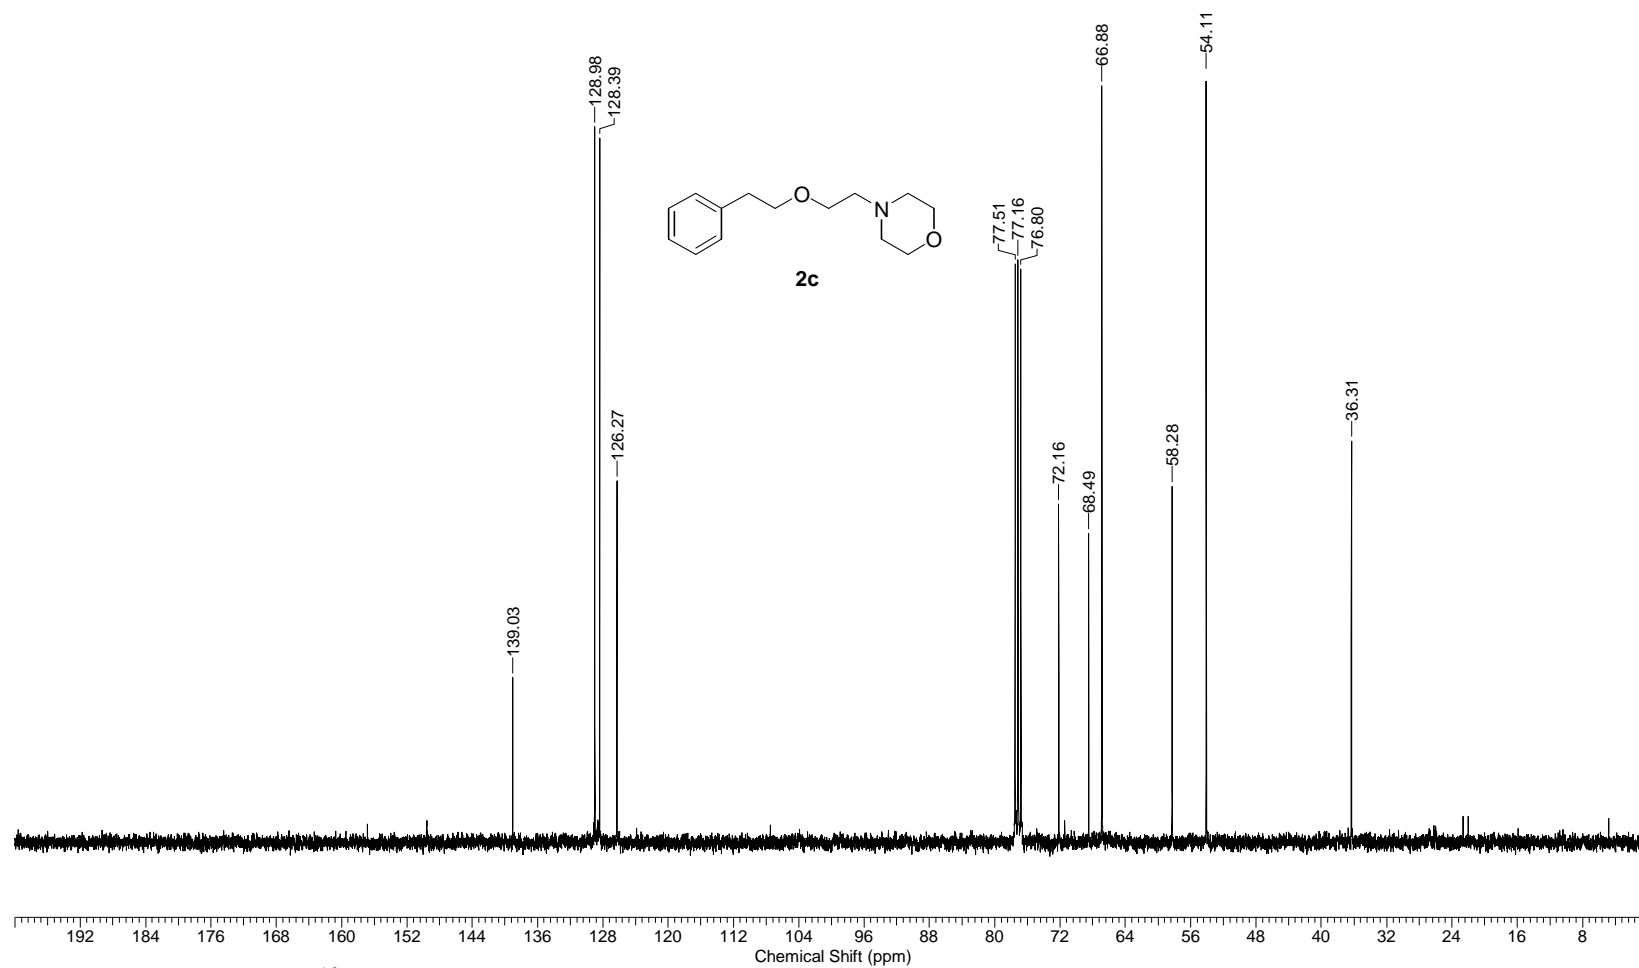

$^{13}\text{C}$  NMR (90 MHz,  $\text{CDCl}_3$ ) Spectrum of 4-(2-benethoxyethyl)-morpholine **2c**  
(Table 3, entry 3)

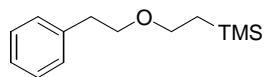

**2d**

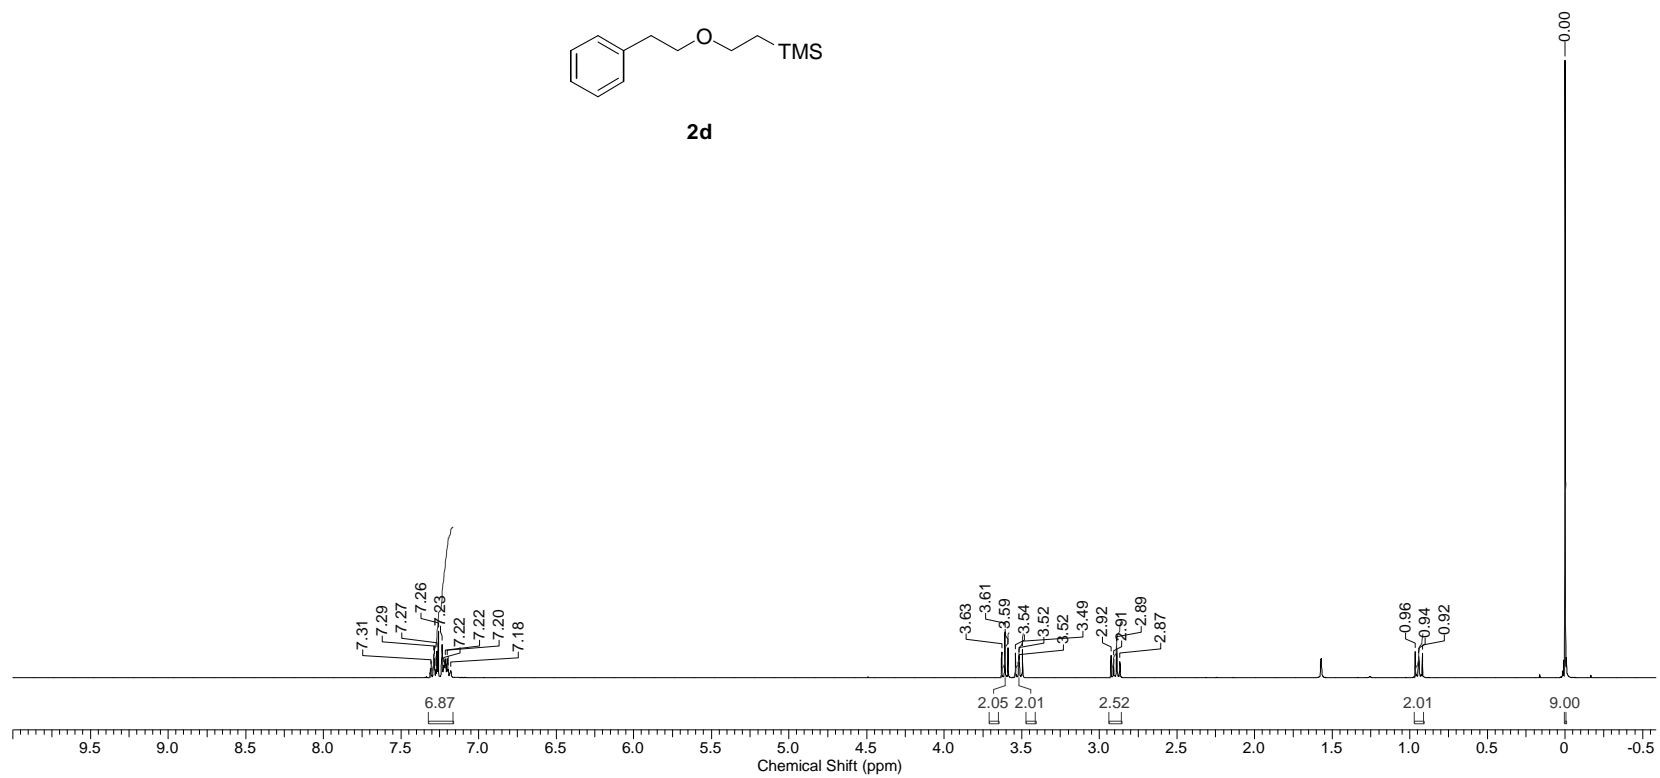

<sup>1</sup>H NMR (360 MHz, CDCl<sub>3</sub>) Spectrum of trimethyl-(2-phenethoxyethyl)silane **2d**  
(Table 3, entry 4)

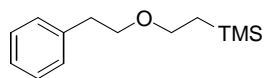

**2d**

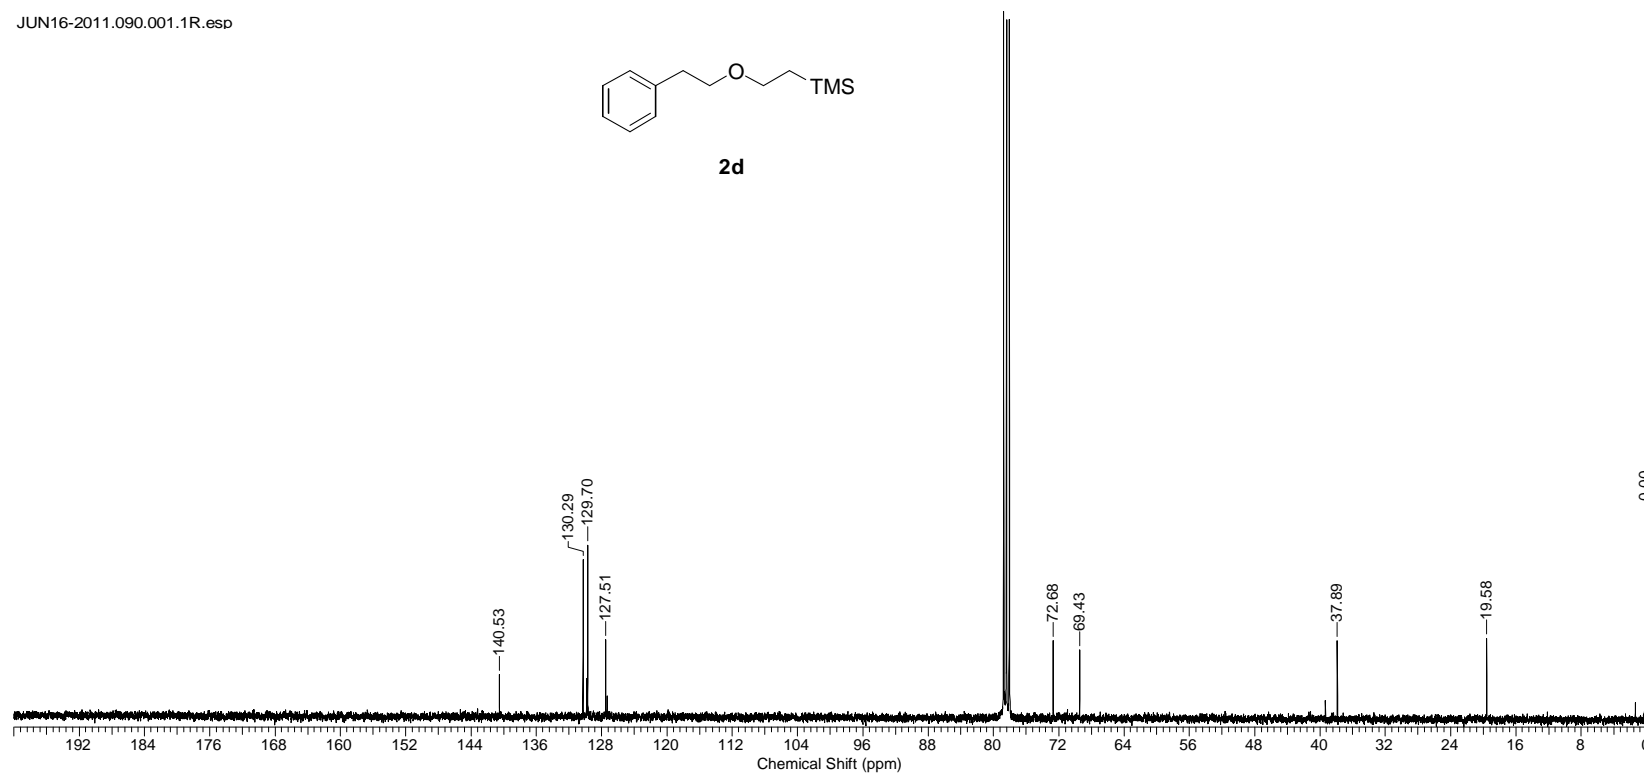

<sup>13</sup>C NMR (90 MHz, CDCl<sub>3</sub>) Spectrum of trimethyl-(2-phenethoxyethyl)silane **2d**  
(Table 3, entry 4)

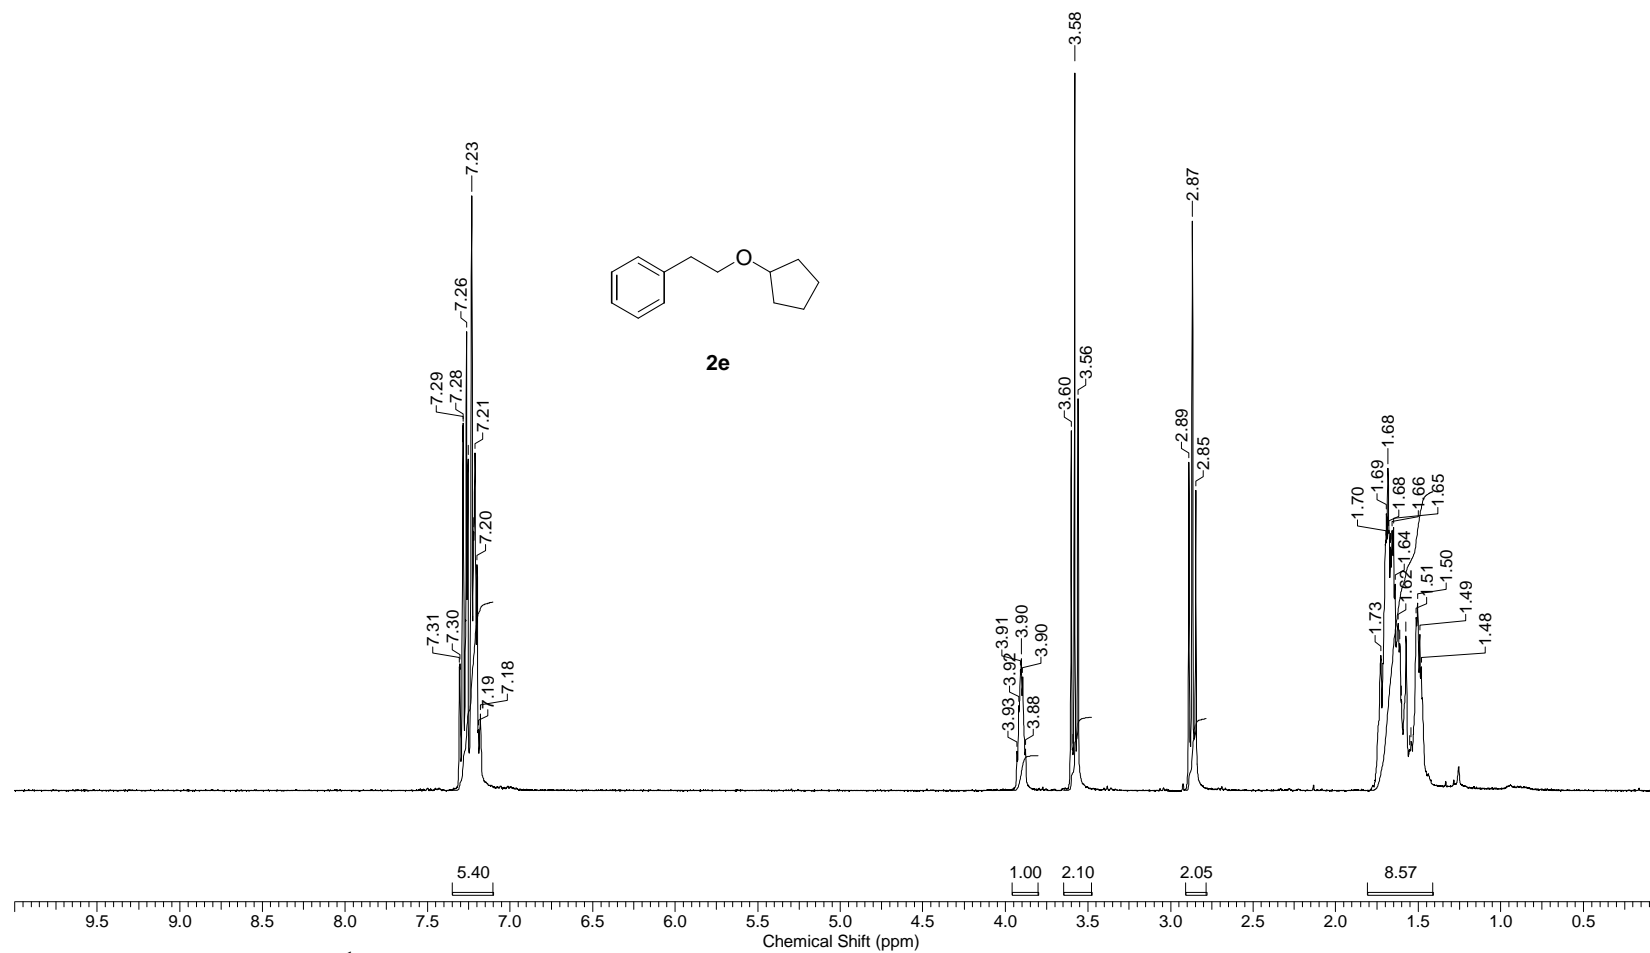

<sup>1</sup>H NMR (360 MHz, CDCl<sub>3</sub>) Spectrum of (2-cyclopentyloxyethyl)benzene **2e**  
(Table 3, entry 5)

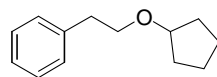**2e**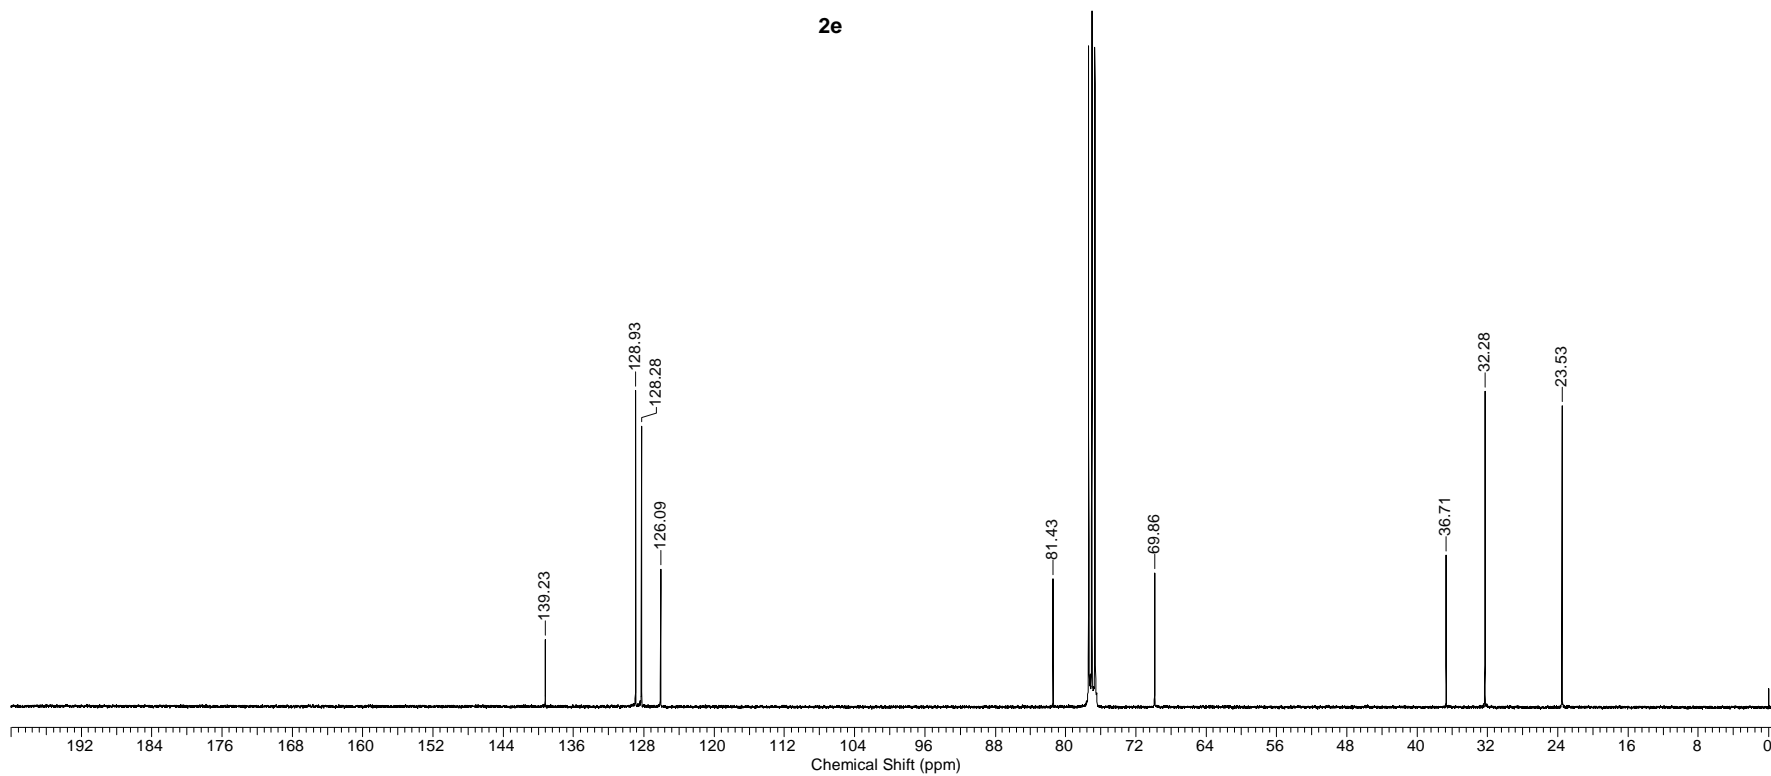

<sup>13</sup>C NMR (90 MHz, CDCl<sub>3</sub>) Spectrum of (2-cyclopentyloxyethyl)benzene **2e**  
(Table 3, entry 5)

S31

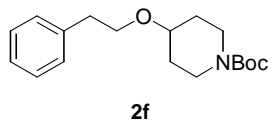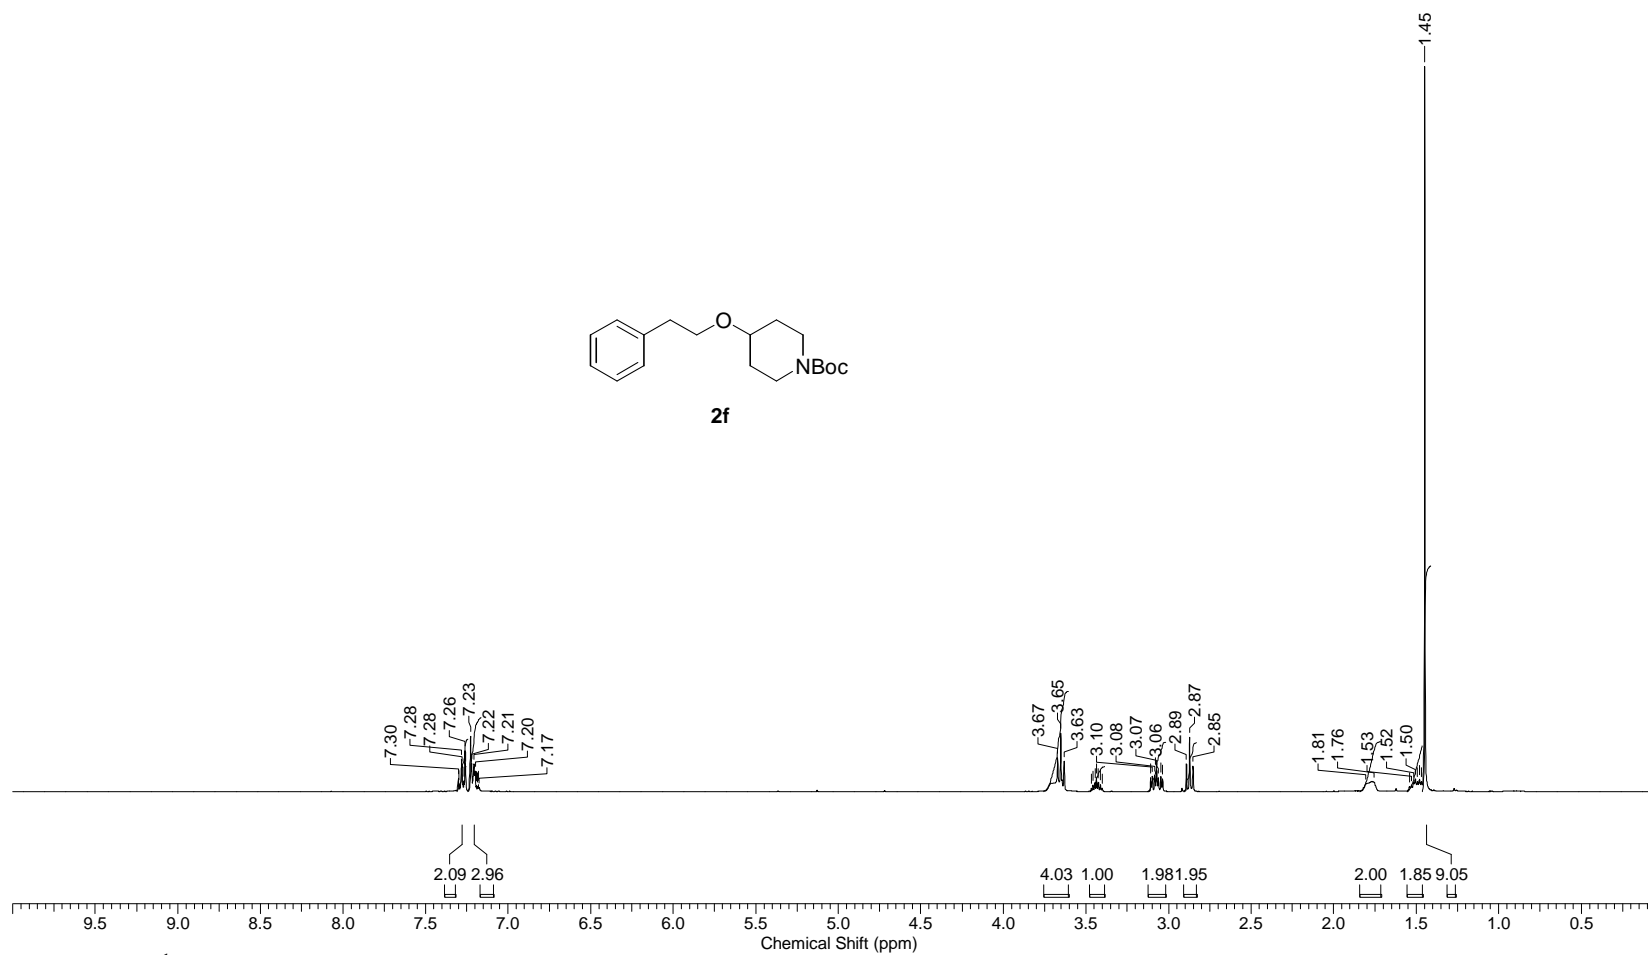

<sup>1</sup>H NMR (360 MHz, CDCl<sub>3</sub>) Spectrum of 4-phenethoxy-piperidine-1-carboxylic acid, *tert*-butyl ester **2f**  
(Table 3, entry 6)



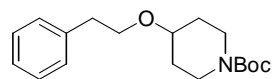

**2f**

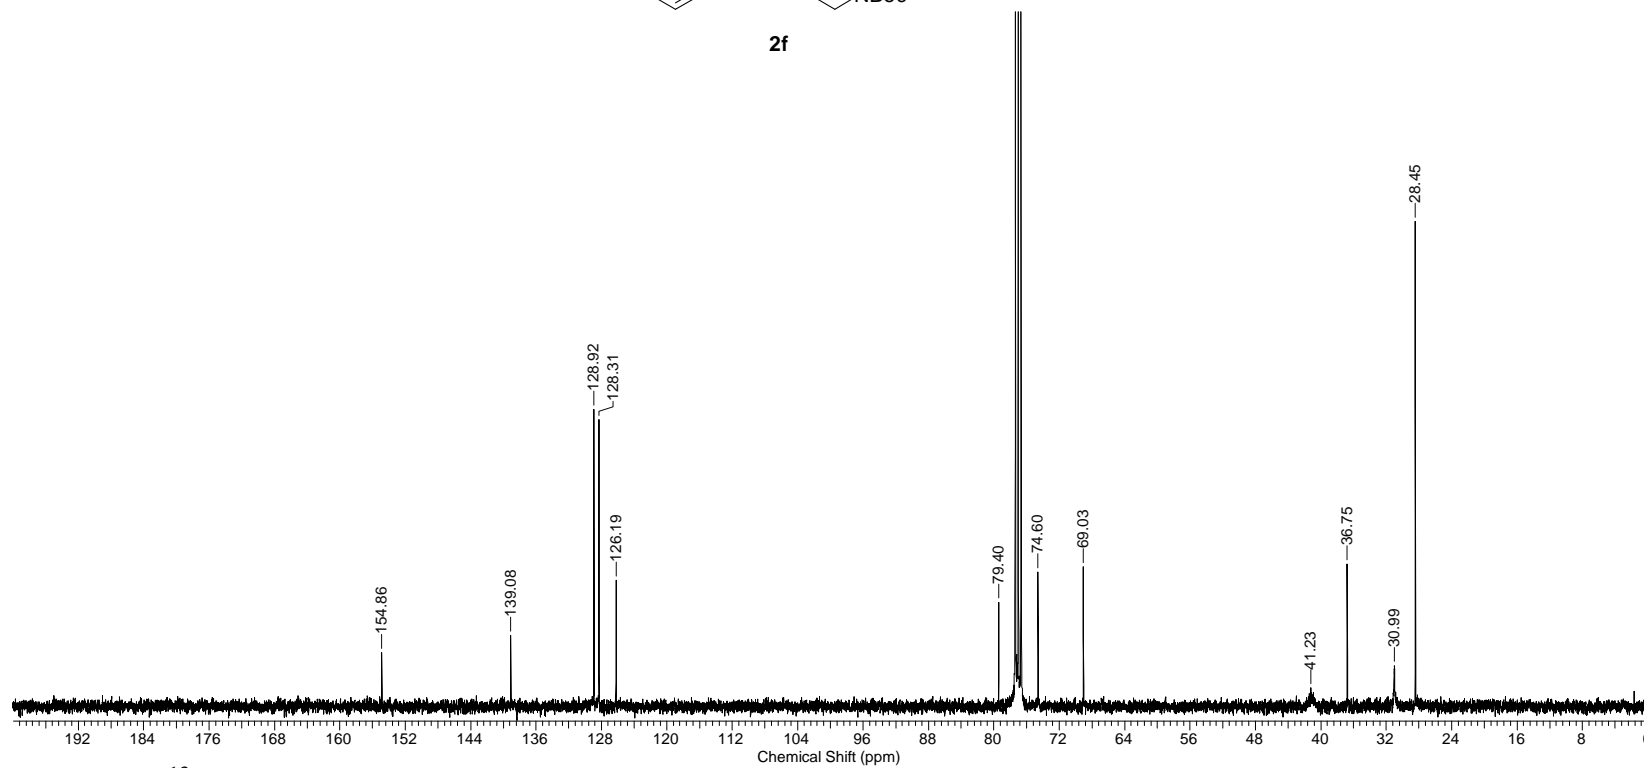

$^{13}\text{C}$  NMR (90 MHz,  $\text{CDCl}_3$ ) Spectrum of -phenethoxy-piperidine-1-carboxylic acid, *tert*-butyl ester **2f**  
(Table 3, entry 6)

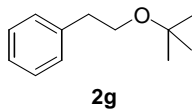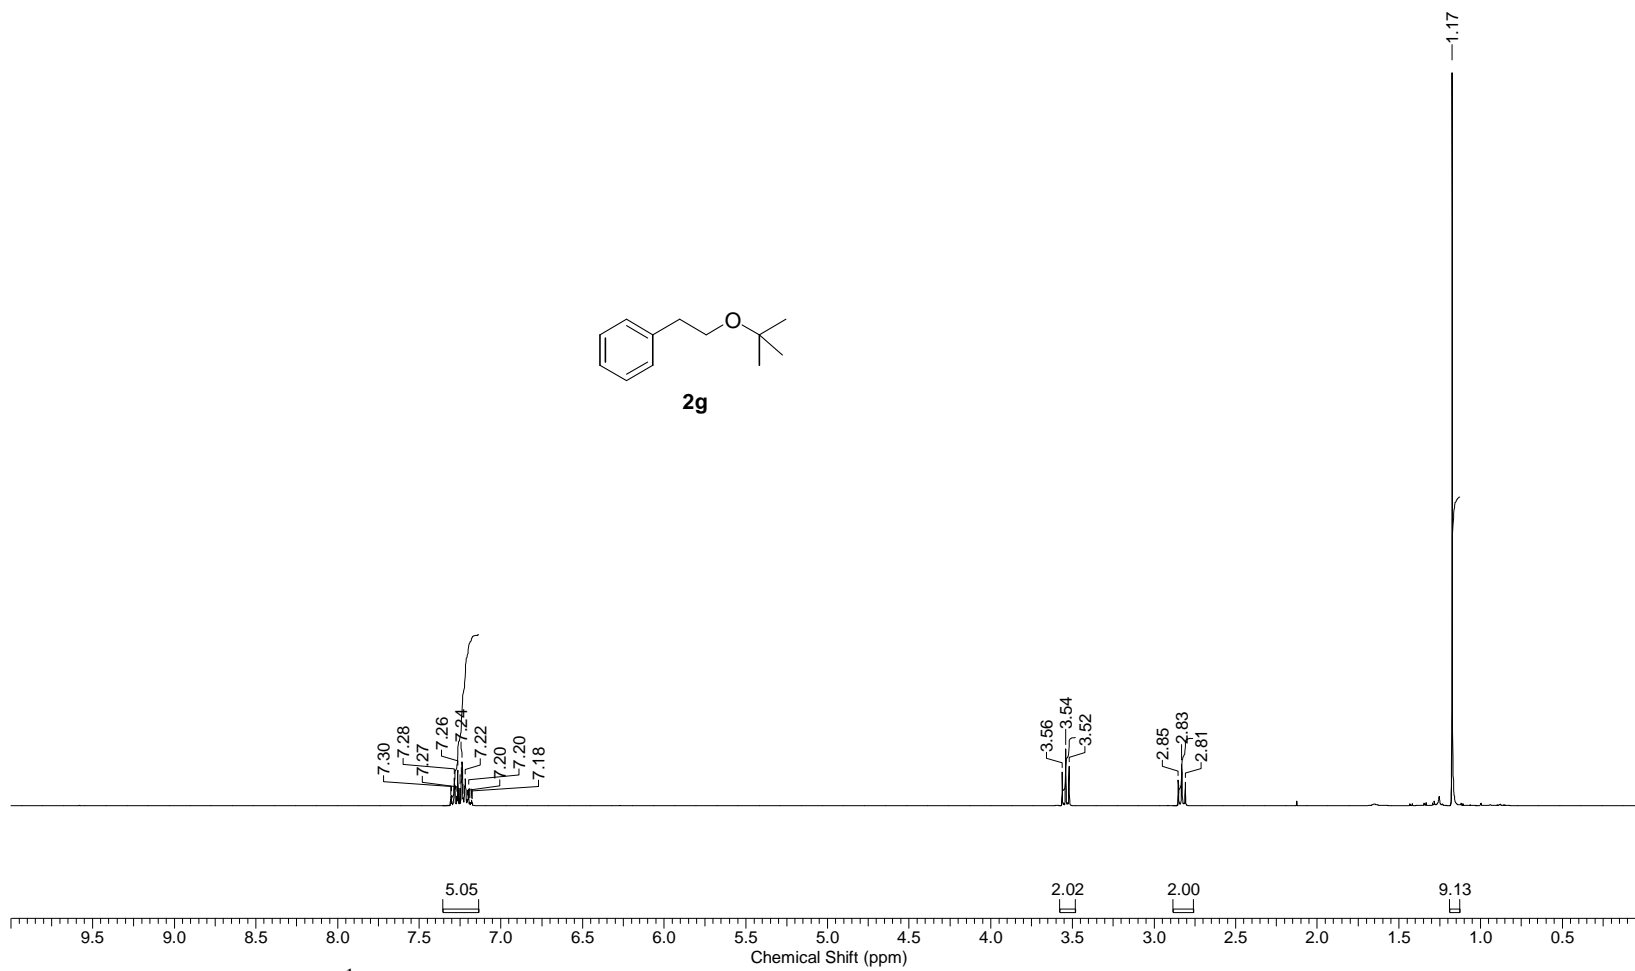

$^1\text{H}$  NMR (360 MHz,  $\text{CDCl}_3$ ) Spectrum of (2-tert-Butoxy-ethyl)-benzene **2g**  
(Table 3, entry 7)

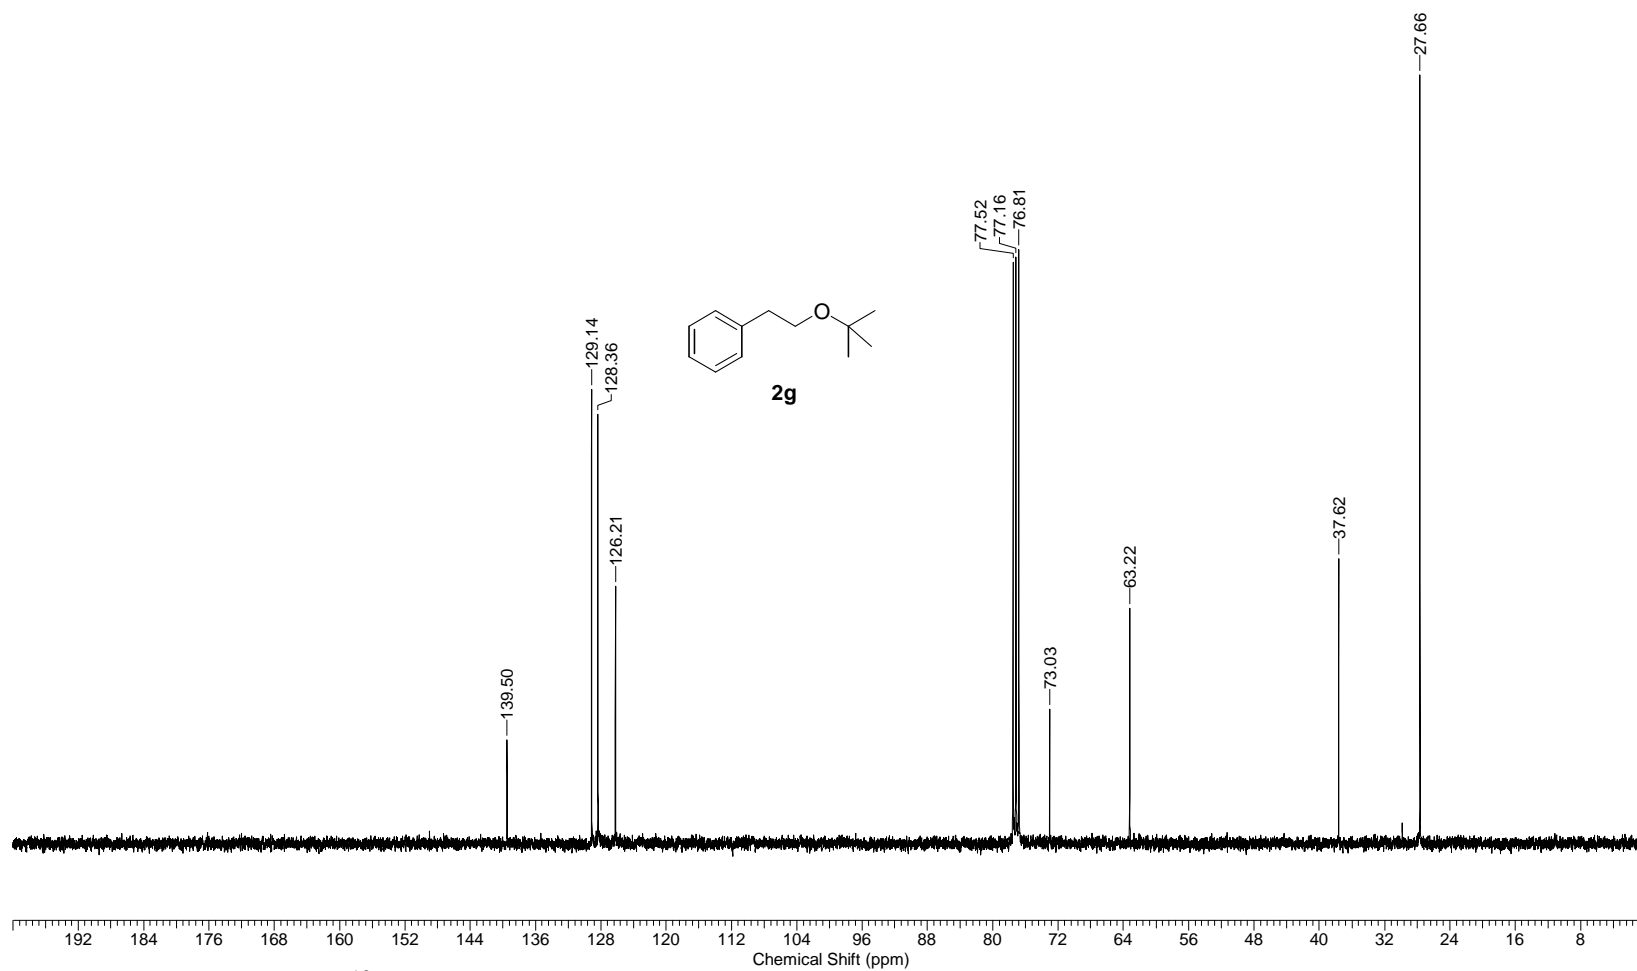

$^{13}\text{C}$  NMR (90 MHz,  $\text{CDCl}_3$ ) Spectrum of (2-tert-Butoxy-ethyl)-benzene **2g**  
(Table 3, entry 7)
